# Supplementary material for: Genome-wide pleiotropy and shared biological pathways for resistance to bovine pathogens
Source: PLoS One. 2018 Apr 2;13(4):e0194374. doi: 10.1371/journal.pone.0194374 (PMC5880348; doi:10.1371/journal.pone.0194374)
Supplement: S1 Table — correlations: Genetic correlations among the 9 calf traits analyzed by G-REMLp-value: p-values for genetic correlations among the 9 calf traits analyzed by G-REMLse: Standard error for genetic correlations among the 9 calf traits analyzed by G-REML. (XLSX) [file pone.0194374.s001.xlsx]

## Sheet: correlations
		Salmonella	Escherichia coli	Bovine respiratory syn.	Bovine herpes virus 1	Trichophyton	Cryptosporidium	Coccidia	Myiasis	Bovicola bovis
2	Salmonella	1	-0.405239	-0.203177	-0.140859	0.554994	0.985027	0.05165	-0.108335	0.082817
1	Escherichia coli	-0.405239	1	0.217523	0.147053	0.000524	0.301925	0.014386	-0.042709	-0.402773
3	Bovine respiratory syn.	-0.203177	0.217523	1	0.119382	-0.168607	-0.200636	0.760156	0.04746	-0.144633
4	Bovine herpes virus 1	-0.140859	0.147053	0.119382	1	-0.105175	0.153278	0.080576	-0.239362	0.7408
6	Trichophyton	0.554994	0.000524	-0.168607	-0.105175	1	0.001445	0	-0.275199	0.047643
8	Cryptosporidium	0.985027	0.301925	-0.200636	0.153278	0.001445	1	0.519974	0.059582	-0.213142
7	Coccidia	0.05165	0.014386	0.760156	0.080576	0	0.519974	1	0.258925	-0.107625
10	Myiasis	-0.108335	-0.042709	0.04746	-0.239362	-0.275199	0.059582	0.258925	1	-0.538021
9	Bovicola bovis	0.082817	-0.402773	-0.144633	0.7408	0.047643	-0.213142	-0.107625	-0.538021	1

## Sheet: p-value
	Salmonella	Escherichia coli	Bovine respiratory syn.	Bovine herpes virus 1	Trichophyton	Cryptosporidium	Coccidia	Myiasis	Bovicola bovis
Salmonella	1	0.2168	0.04224	0.1548	1e-05	1e-05	0.3146	0.1904	0.2932
Escherichia coli	0.2168	1	0.1549	0.2739	0.4989	0.04522	0.4644	0.4145	0.05614
Bovine respiratory syn.	0.04224	0.1549	1	0.1959	0.1032	0.02887	1e-05	0.3684	0.1913
Bovine herpes virus 1	0.1548	0.2739	0.1959	1	0.176	0.1139	0.1811	0.2056	3.867e-05
Trichophyton	1e-05	0.4989	0.1032	0.176	1	0.4941	0.99	0.03011	0.3937
Cryptosporidium	1e-05	0.04522	0.02887	0.1139	0.4941	1	1e-05	0.3219	0.07943
Coccidia	0.3146	0.4644	1e-05	0.1811	0.99	1e-05	1	0.01507	0.2368
Myiasis	0.1904	0.4145	0.3684	0.2056	0.03011	0.3219	0.01507	1	1e-05
Bovicola bovis	0.2932	0.05614	0.1913	3.867e-05	0.3937	0.07943	0.2368	1e-05	1

## Sheet: se
	Salmonella	Escherichia coli	Bovine respiratory syn.	Bovine herpes virus 1	Trichophyton	Cryptosporidium	Coccidia	Myiasis	Bovicola bovis
Salmonella	0	0.137538	0.119031	0.126319	0.069409	0.005722	0.087312	0.119031	0.143569
Escherichia coli	0.137538	0	0.166247	0.251205	0.161379	0.166779	0.164358	0.202333	0.24341
Bovine respiratory syn.	0.119031	0.166247	0	0.164023	0.10824	0.102165	0.061546	0.141476	0.165843
Bovine herpes virus 1	0.126319	0.251205	0.164023	0	0.122155	0.142522	0.131367	0.175701	0.188024
Trichophyton	0.069409	0.161379	0.10824	0.122155	0	0.091493	0.087009	0.092691	0.117374
Cryptosporidium	0.005722	0.166779	0.102165	0.142522	0.091493	0	0.061606	0.128257	0.150165
Coccidia	0.087312	0.164358	0.061546	0.131367	0.087009	0.061606	0	0.116457	0.144767
Myiasis	0.119031	0.202333	0.141476	0.175701	0.092691	0.128257	0.116457	0	0.058561
Bovicola bovis	0.143569	0.24341	0.165843	0.188024	0.117374	0.150165	0.144767	0.058561	0
