# Supplementary material for: Genome-wide pleiotropy and shared biological pathways for resistance to bovine pathogens
Source: PLoS One. 2018 Apr 2;13(4):e0194374. doi: 10.1371/journal.pone.0194374 (PMC5880348; doi:10.1371/journal.pone.0194374)
Supplement: S8 Table — (XLSX) [file pone.0194374.s008.xlsx]

## Sheet: Sheet1
Code	Technical term	Synonyms; explanations	Type (DD = descriptive diagnosis, CD = causal diagnosis, E = examination, T = therapy)	Transformation T (therapy) in DD (descriptive diagnosis) [code] or exclusion from analyses [EX]	Sex-specific (f=female, m=male)	Category (LACT=lactation-related, REPRO= reproduction-related, PART= calving-related)	Time frame of recording age	Time frame of recording time point	Repeated recording possible (y=yes / n=no; T=animal, L=lactation)	Average disease duration in days
1.	Organ diseases								y	21 days
1.01.	Diseases of skin, subcutis and coat								y	21 days
1.01.00.	Examination of skin, subcutis and coat with no abnormality detected		E						y
1.01.01.	Hereditary diseases of skin, subcutis and coat		DD			calf	0-6 months		n
1.01.01.01.	Hereditary parakeratosis	inherited disturbance of keratin production	DD			calf	0-6 months		n
1.01.02.	Malformations of skin, subcutis and coat		DD			calf	0-6 months		n
1.01.02.01.	Atrichia congentia (congenital atrichosis)	congenital hairlessness	DD			suckling calf	0-12 weeks		n
1.01.03.	Dermal tumors		DD						y	21 days
1.01.04.	Injuries of skin, subcutis and coat		DD						y	21 days
1.01.05.	Coat disorders		DD						y	21 days
1.01.05.01.	Alopecia (hair loss)		DD						y	21 days
1.01.06.	Acne	purulent inflammation of hair follicles and sebaceous glands	DD						y	21 days
1.01.07.	Furunculosis	disseminated deep purulent inflammation of hair follicles and sebaceous glands	DD						y	21 days
1.01.07.01.	Furunculosis caudae	disseminated deep purulent inflammation of hair follicles and sebaceous glands at the root of the tail	DD						y	21 days
1.01.08.	Seborrhea / Pityriasis	abnormally increased sebum production	DD						y	21 days
1.01.09.	Eczema	superficial skin rash	DD						y	21 days
1.01.10.	Exanthema	symptomatic superficial skin rash accompanying eruptive disease or fever	DD						y	21 days
1.01.10.01.	Urticaria	nettle rash, hives	DD						y	21 days
1.01.11.	Dermatitis	deep inflammation of the skin	DD						y	21 days
1.01.11.01.	Photodermatitis	photosensitive dermatitis, primary photosensitization; increased sensitivity to light with sunlight-induced inflammation of the skin	DD						y	21 days
1.01.12.	Hyperkeratosis	abnormally increased keratinization (keratin production) with dry keratin products	DD						y	21 days
1.01.13.	Parakeratosis	disturbance of keratinization (keratin production) with greasy keratin products	DD						y	21 days
1.01.14.	Subcutaneous emphysema	subcutaneous gas accumulation	DD						y	21 days
1.01.15.	Subcutaneous edema	subcutaneous accumulation of serous fluid	DD						y	21 days
1.01.16.	Subcutaneous hematoma	subcutaneous accumulation of blood	DD						y	21 days
1.01.17.	Phlegmona	inflammation of subcutaneous connective tissue	DD						y	21 days
1.01.17.01.	Pelvical phlegmona	inflammation of pelvic connective tissue	DD			PART	from 18 months	0-50 days p.p.	y	21 days
1.01.18.	Subcutaneous abscess	subcutaneous encapsulated pus accumulation	DD						y	21 days
1.01.99.	Other disorders of skin, subcutis and coat		DD						y	21 days
1.02.	Diseases of the trunk								y	21 days
1.02.00.	Examination of the trunk with no abnormality detected		E						y
1.02.01.	Hereditary diseases of the trunk		DD			calf	0-6 months		n
1.02.02.	Malformations of the trunk		DD			calf	0-6 months		n
1.02.02.01.	Hernia congenita (inherited herniation)		DD			calf	0-6 months		n
1.02.02.01.01.	Hernia umbilicalis congenita (inherited umbilical hernia)	inherited navel rupture	DD			calf	0-6 months		n
1.02.02.01.02.	Hernia inguinalis congenita (inherited inguinal hernia)		DD			calf	0-6 months		n
1.02.02.01.03.	Hernia ventralis congenita (inherited ventral hernia)		DD			calf	0-6 months		n
1.02.02.01.04.	Hernia diaphragmatica congenita (inherited diaphragmatic hernia)	inherited diaphragm defects	DD			calf	0-6 months		n
1.02.03.	Tumors of the trunk		DD						y	21 days
1.02.04.	Injuries of the trunk		DD						y	21 days
1.02.05.	Omphalitis (inflammation of the navel)		DD			suckling calf	0-12 weeks		y	21 days
1.02.05.01.	Omphalophlebitis	inflammation of the navel vein	DD			suckling calf	0-12 weeks		y	21 days
1.02.05.02.	Omphaloarteriitis	inflammation of the navel artery	DD			suckling calf	0-12 weeks		y	21 days
1.02.05.03.	Omphalourachitis	inflammation of the fibrous remnants of the allantois	DD			suckling calf	0-12 weeks		y	21 days
1.02.06.	Hernia acquisita (acquired herniation)		DD						y	21 days
1.02.06.01.	Hernia inguinalis acquisita (acquired inguineal hernia)		DD						y	21 days
1.02.06.02.	Hernia ventralis acquisita (acquired ventral hernia)		DD						y	21 days
1.02.06.03.	Hernia perinealis acquisita (acquired herniation of the perineum)		DD						y	21 days
1.02.06.04.	Hernia diaphragmatica acquisita (acquired diaphragmatic hernia)		DD						y	21 days
1.02.07.	Ruptura diaphragmatis (rupture of the diaphragm)		DD						y	21 days
1.02.08.	Amputation of the tail due to injury		T	1.02.04.					n
1.02.99.	Other trunk disorders		DD						y	21 days
1.03.	Horn diseases								y	21 days
1.03.00.	Examination of the horns with no abnormality detected		E						y
1.03.01.	Hereditary diseases of horns		DD			calf	0-6 months		n
1.03.02.	Horn malformations		DD			calf	0-6 months		n
1.03.03.	Horn tumors		DD						y	21 days
1.03.04.	Injuries of horns		DD						y	21 days
1.03.04.01.	Loss of horn covering		DD						y	21 days
1.03.05.	Horn deformation		DD						y	21 days
1.03.06.	Fractura processus cornualis (fracture of osseous core of horns)		DD						n
1.03.07.	Resectio cornu (shortening of horns)		T	EX					y
1.03.08.	Amputatio cornu (dehorning)		T	EX					n
1.03.99.	Other horn disorders		DD						y	21 days
1.04.	Diseases of the lymphoid system								y	21 days
1.04.00.	Examination of the lymphoid system with no abnormality detected		E						y
1.04.01.	Hereditary diseases of the lymphoid system		DD			calf	0-6 months		n
1.04.02.	Lymphoid malformations		DD			calf	0-6 months		n
1.04.03.	Sporadic lymphoid tumors		DD						y	21 days
1.04.04.	Lymphadenosis (swelling of lymph nodes)		DD						y	21 days
1.04.05.	Lymphadenitis (inflammation of lymph nodes)		DD						y	21 days
1.04.06.	Lymphangitis (inflammation of lymph vessels)		DD						y	21 days
1.04.99.	Other disorders of the lymphoid system		DD						y	21 days
1.05.	Diseases of the cardiovascular system								y	21 days
1.05.00.	Examination of the cardiovascular system with no abnormality detected		E						y
1.05.01.	Hereditary diseases of the cardiovascular system		DD			calf	0-12 months		n
1.05.01.01.	BLAD = Bovine Leukocyte Adhesion Deficiency	inherited failure of the immune system	DD			calf	0-12 months		n
1.05.02.	Malformations of the cardiovascular system		DD			calf	0-12 months		n
1.05.02.01.	Foramen ovale persistens (patent foramen ovale)	congenital cardiac defect with permanent short-cut between left and right atrium	DD			calf	0-12 months		n
1.05.02.02.	Foramen interventriculare persistens (patent foramen interventriculare)	congenital cardiac defect with permanent short-cut between left and right ventricle	DD			calf	0-12 months		n
1.05.02.03.	Ductus arteriosus Botalli persistens (patent ductus arteriosus)	congenital cardiac defect with permanent short-cut between aorta and truncus pulmonalis, i.e. pulmonal artery	DD			calf	0-12 months		n
1.05.03.	Tumors of the cardiovascular system		DD						y	21 days
1.05.04.	Injuries of the cardiovascular system		DD						y	21 days
1.05.05.	Cardiac diseases		DD						y	21 days
1.05.05.01.	Cardiac insufficiency		DD						y	21 days
1.05.05.02.	Heart arrhythmia		DD						y	21 days
1.05.05.03.	Endocarditis (inflammation of the inner layer of the heart)		DD						y	21 days
1.05.05.03.01.	Vitium cordis (disorders of cardiac valves)		DD						y	21 days
1.05.05.04.	Myocarditis (inflammation of the muscular layer of the heart)		DD						y	21 days
1.05.05.05.	Pericarditis (inflammation of the pericardium)		DD						y	21 days
1.05.05.05.01.	Pericarditis traumatica (trauma-induced inflammation of the pericardium)	traumatic pericarditis; inflammation of the pericardium related to ingested foreign bodies penetrating the forestomach	DD						y	21 days
1.05.06.	Disorders of blood vessels		DD						y	21 days
1.05.06.01.	Circulation insufficiency		DD						y	21 days
1.05.06.02.	Shock (acute circulation insufficiency)		DD						y	21 days
1.05.06.02.01.	Hypovolemic shock		DD						y	21 days
1.05.06.02.02.	Endotoxin-induced shock	septic circulation insufficiency due to cell wall components of gram-negative bacteria	DD						y	21 days
1.05.06.03.	Hemorrhage (bleeding)		DD						y	21 days
1.05.06.04.	Thrombophlebitis (inflammation of veins with secondary thrombus formation)		DD						y	21 days
1.05.06.04.01.	Thrombophlebitis arrosiva venae cavae caudalis (arrosive thrombophlebitis of caudal vena cava)		DD						y	21 days
1.05.06.05.	Thrombosis arterialis / Embolia arterialis (arterial thrombosis and embolism)	occlusion of arterial blood vessels	DD						y	21 days
1.05.07.	Blood disorders		DD						y	21 days
1.05.07.01.	Anemia		DD						y	21 days
1.05.07.01.01.	Hypoplastic anemia (anemia with reduction of blood cell formation)		DD						y	21 days
1.05.07.01.02.	Hemorrhagic anemia (anemia due to bloodloss)		DD						y	21 days
1.05.07.01.03.	Haemolytic anemia (anemia with lysis of blood cells)		DD						y	21 days
1.05.07.01.03.01.	Haemoglobinuria due to hyperhydratation (water poisoning)	lysis of red blood cells and urinary excretion of haemoglobin after excessive water intake	DD						y	21 days
1.05.07.01.03.02.	Puerperal haemoglobinuria	lysis of red blood cells and urinary excretion of haemoglobin after calving	DD			PART	from 18 months	0-50 days p.p.	y	21 days
1.05.07.01.03.03.	Cabbage-induced anemia	lysis of red blood cells after ingestion of cabbage	DD						y	21 days
1.05.07.01.04.	Deficiency anemia	anemia due to deficiency of components required for erythropoesis, i.e. formation of red blood cells	DD						y	21 days
1.05.07.02.	Haemoconcentration		DD						y	21 days
1.05.07.03.	Polycythemia	increased number of blood cells	DD						y	21 days
1.05.07.04.	Leukopenia	reduced number of circulating white blood cells	DD						y	21 days
1.05.07.05.	Leukocytosis	increased number of circulating white blood cells	DD						y	21 days
1.05.08.	Haemorrhagic diatheses	disturbances of blood clotting with increased bleeding tendency	DD						y	21 days
1.05.08.01.	Coagulopathia	disturbance of blood clotting due to impaired function of coagulation factors	DD						y	21 days
1.05.08.02.	Thrombocytopathia	disturbance of blood clotting due to impaired thrombocyte function	DD						y	21 days
1.05.08.03.	Vasopathia	disturbance of blood clotting due to impaired function of blood vessels	DD						y	21 days
1.05.09.	Spleen disorders		DD						y	21 days
1.05.09.01.	Splenomegalia (swollen spleen)		DD						y	21 days
1.05.09.02.	Spleen rupture		DD						y	21 days
1.05.09.03.	Splenitis (inflammation of the spleen)		DD						y	21 days
1.05.09.03.01.	Splenitis apostematosa (purulent inflammation of the spleen)		DD						y	21 days
1.05.99.	Other disorders of the circulatory system		DD						y	21 days
1.06.	Diseases of the respiratory tract								y	21 days
1.06.00.	Examination of the respiratory tract with no abnormality detected		E						y
1.06.01.	Hereditary disease of the respiratory tract		DD			calf	0-6 months		n
1.06.02.	Malformations of the respiratory tract		DD			calf	0-6 months		n
1.06.03.	Tumors of the respiratory tract		DD						y	21 days
1.06.04.	Injuries of the respiratory tract		DD						y	21 days
1.06.05.	Diseases of nasal cavity and paranasal sinuses		DD						y	21 days
1.06.05.01.	Epistaxis (nosebleed)		DD						y	21 days
1.06.05.02.	Rhinitis (inflammation of nasal mucus membranes)		DD						y	21 days
1.06.05.03.	Sinusitis (inflammation of paranasal mucus membranes)		DD						y	21 days
1.06.05.04.	Disorders relating to foreign material in the nasal cavity and paranasal sinuses		DD						y	21 days
1.06.06.	Diseases of larynx and trachea		DD						y	21 days
1.06.06.01.	Hemiplegia laryngis (one-sided paralysis of the larynx)		DD						y	21 days
1.06.06.02.	Oedema laryngis (edema of the larynx)	laryngeal accumulation of serous fluid	DD						y	21 days
1.06.06.03.	Laryngitis (inflammation of the larynx)		DD						y	21 days
1.06.06.03.01.	Laryngitis follicularis (follicular inflammation of the larynx)		DD						y	21 days
1.06.06.03.02.	Laryngitis diphteroidea (diphtheroid inflammation of the larynx)		DD						y	21 days
1.06.06.04.	Tracheitis (inflammation of the trachea)		DD						y	21 days
1.06.06.04.01.	Tracheitis diphteroidea (diphtheroid inflammation of the trachea)		DD						y	21 days
1.06.06.05.	Disorders relating to foreign material in the larynx and trachea		DD						y	21 days
1.06.07.	Diseases of the bronchial tubes and lungs		DD						y	21 days
1.06.07.01.	Asphyxia neonatorum	insufficiency of the respiratory system in the newborn calf	DD			neonate calf	0-7 days		n
1.06.07.01.01.	Early asphyxia (intrauterine asphyxia)	respiratory insufficiency in the new-born calf due to disturbance of feto-maternal gas exchange	DD			neonate calf	0-7 days		n
1.06.07.01.02.	Late asphyxia (postnatal asphyxia)	respiratory insufficiency in the new-born calf due to immaturity of the lungs	DD			neonate calf	0-7 days		n
1.06.07.02.	Atelektasis pulmonum (collapse of lung tissue)		DD						y	21 days
1.06.07.03.	Hemoptoe due to bleeding of the lungs		DD						y	21 days
1.06.07.04.	Oedema pulmorum (lung edema)	effusion of serous fluid in interstitial tissue and alveoli of the lungs	DD						y	21 days
1.06.07.05.	Emphysema pulmonum (lung emphysema)	inclusion of air in the lungs	DD						y	21 days
1.06.07.05.01.	Acute alveolar lung emphysema	acute / temporary inclusion of air in overexpanded alveoli of the lungs	DD						y	21 days
1.06.07.05.02.	Chronic alveolar lung emphysema	chronic / permanent inclusion of air in overexpanded alveoli of the lungs	DD						y	21 days
1.06.07.05.03.	Interstitial lung emphysema	inclusion of air in interstitial tissue of the lungs	DD						y	21 days
1.06.07.05.04.	Fog fever	acute lung edema and emphysema with interstitial pneumonia in cows moved to lush pastures	DD						y	21 days
1.06.07.06.	Bronchopneumonia (inflammation of bronchial tubes and lungs)		DD						y	21 days
1.06.07.06.01.	Bronchitis catarrhalis (catarrhal inflammation of the bronchial tubes)		DD						y	21 days
1.06.07.06.02.	Bronchopneumonia catarrhalis (catarrhal inflammation of the bronchial tubes and the lungs)		DD						y	21 days
1.06.07.06.03.	Bronchopneumonia fibrinosa sive crouposa (fibrinous inflammation of the bronchial tubes and lungs)		DD						y	21 days
1.06.07.06.04.	Bronchopneumonia suppurativa / Bronchopneumonia apostematosa (purulent or absceding bronchopneumonia)	purulent or absceding inflammation of the bronchial tubes and lungs	DD						y	21 days
1.06.07.06.05.	Bronchopneumonia gangraenosa / Gangraena pulmonum (gangrenous bronchopneumonia)	gangrenous inflammation of the bronchial tubes and lungs	DD						y	21 days
1.06.07.06.06.	Pneumonia interstitialis chronica (chronic interstitial pneumonia)	chronic interstitial inflammation of the lungs	DD						y	21 days
1.06.07.06.07.	Enzootic pneumonia of calves	multifactorial inflammation of the lungs in calves	DD			calf	0-12 months		y	21 days
1.06.07.07.	Diseases of pleura and pleural cavity		DD						y	21 days
1.06.07.07.01.	Pleuritis (inflammation of the pleura)		DD						y	21 days
1.06.07.07.02.	Hydrothorax	effusion of serous fluid in the pleural cavity	DD						y	21 days
1.06.07.07.03.	Haemothorax	accumulation of blood in the pleural cavity	DD						y	21 days
1.06.07.07.04.	Pneumothorax	accumulation of air in the pleural cavity	DD						y	21 days
1.06.07.07.05.	Chylothorax	accumulation of lymphatic fluid in the pleural cavity	DD						y	21 days
1.06.99.	Other disorders of the respiratory tract		DD						y	21 days
1.07.	Diseases of the digestive tract								y	21 days
1.07.00.	Examination of the digestive tract with no abnormality detected		E						y
1.07.01.	Inherited diseases of the digestive tract		DD			calf	0-6 months		n
1.07.02.	Malformations of the digestive tract		DD			calf	0-6 months		n
1.07.02.01.	Atresia ani et recti	missing anus and rectum	DD			neonate calf	0-7 days		n
1.07.03.	Tumors of the digestive tract		DD						y	21 days
1.07.04.	Injuries of the digestive tract		DD						y	21 days
1.07.05.	Diseases of the oral cavity		DD						y	21 days
1.07.05.01	Stomatitis	inflammation of the oral mucosa	DD						y	21 days
1.07.05.02.	Glossitis	inflammation of the tongue	DD						y	21 days
1.07.05.02.01.	Ulcus linguae (ulceration of the dorsum of the tongue)		DD						y	21 days
1.07.05.02.02.	Glossoplegia / Paralysis linguae (paralysis of the tongue)		DD						y	21 days
1.07.05.03.	Diseases of the teeth		DD						y	21 days
1.07.05.04.	Foreign material in the oral cavity		DD						y	21 days
1.07.06.	Diseases of the jaw and mastication muscles		DD						y	21 days
1.07.06.01.	Abscess of the cheeks		DD						y	21 days
1.07.06.02.	Arthritis mandibularis	inflammation of the temporomandibular joint	DD						y	21 days
1.07.06.03.	Paralysis nervi facialis (paralysis of the facial nerve)		DD						y	21 days
1.07.06.04.	Paralysis nervi trigemini (paralysis of the trigeminus nerve) / Paralysis of mastication muscles		DD						y	21 days
1.07.07.	Diseases of the salivary glands		DD						y	21 days
1.07.07.01.	Ptyalismus (drooling)		DD						y	21 days
1.07.07.02.	Sialoadenitis (inflammation of the salivary glands)	Parotitis (inflammation of the parotid salivary gland) / Sialoadenitis mandibularis (inflammation of the mandibular salivary gland) / Sialoadenitis sublingualis (inflammation of the sublingual salivary gland)	DD						y	21 days
1.07.07.03.	Foreign material in the salivary glands		DD						y	21 days
1.07.08.	Diseases of the pharynx		DD						y	21 days
1.07.08.01.	Pharyngitis (inflammation of the pharynx)		DD						y	21 days
1.07.08.02.	Paralysis pharyngis (paralysis of the pharynx)		DD						y	21 days
1.07.09.	Diseases of the oesophagus		DD						y	21 days
1.07.09.01.	Oesophagitis (inflammation of the oesophagus)		DD						y	21 days
1.07.09.02.	Obstructio oesophagi (obstruction of the oesophagus)		DD						y	21 days
1.07.09.03.	Stenosis oesophagi (stenosis of the oesophagus)		DD						y	21 days
1.07.09.04.	Dilatatio oesophagi / Diverticulum oesophagi (oesophageal dilatation and diverticle formation)		DD						y	21 days
1.07.09.05.	Oesophagospasmus (spasm of the oesophagus muscles)		DD						y	21 days
1.07.09.06.	Paralysis oesophagie (paralysis of the oesophagus)		DD						y	21 days
1.07.10.	Diseases of reticulum and rumen		DD						y	21 days
1.07.10.01.	Oesophageal groove dysfunction	impaired reflex action of oesophageal groove closure	DD			suckling calf	0-12 weeks		y	21 days
1.07.10.02.	Indigestiones vitulorum (indigestion of weaners)	impaired digestion during transition from milk to plant feeding	DD			weaned calf	6-32 weeks		y	21 days
1.07.10.03.	Indigestion	impaired digestion in ruminating cattle	DD						y	21 days
1.07.10.04.	Simple dysfunction of the forestomach	reduced activity of forestomach due to low food intake	DD						y	21 days
1.07.10.05.	Alcalosis ingestorum ruminis (ruminal alkalosis)	forestomach dysfunction with ruminal pH increase to > 7.5	DD						y	21 days
1.07.10.05.01.	Putrefactio ingestorum ruminis (ruminal putrefaction)	putrescence of ruminal content due to replacement of the physiological ruminal microflora by putrifying bacteria and moulds	DD						y	21 days
1.07.10.06.	Acidosis ingestorum ruminis (ruminal acidosis)	reduction of ruminal pH to < 6.0	DD						y	21 days
1.07.10.06.01	Lactacidosis ingestorum ruminis acuta (acute ruminal acidosis)	rapid drop of ruminal pH due to excessive production of lactic acid	DD						y	21 days
1.07.10.06.02.	Acidosis ingestorum ruminis subacuta (subacute ruminal acidosis)	lasting reduction of ruminal pH due to maladaptation of ruminal microflora	DD						y	21 days
1.07.10.06.03.	Acidosis ingestorum ruminis chronica (chronic and latent ruminal acidosis)	altered function of ruminal mirobial function with increased ruminal concentration of volatile fatty acids	DD						y	21 days
1.07.10.07.	Tympania ruminis (ruminal tympany)	ruminal bloat	DD						y	21 days
1.07.10.07.01.	Acute ruminal tympany with accumulation of free gas (free-gas ruminal tympany)	free-gas bloat, secondary bloat; fast overdistention of rumen and reticulum due to abnormal accumulation of free fermentation gas above the ingesta	DD						y	21 days
1.07.10.07.02.	Ruminal tympany with entrapment of gas in stable foam	frothy bloat, primary bloat; overdistention of rumen und reticulum due to abnormal accumulation of fermentation gas entrapped in stable foam	DD						y	21 days
1.07.10.07.03.	Tympania ruminis chronica recidivaria (chronic-recurrent ruminal tympany)	relapsing overdistention of the rumen due to abnormal accumulation of fermentation gas	DD						y	21 days
1.07.10.07.03.01.	Impaired ingesta passage through the forestomach due to agglomerates of foreign material		DD						y	21 days
1.07.10.08.	Vagal indigestion	Hoflund syndrome; impaired function of the forestomach due to lesions of the vagal nerve	DD						y	21 days
1.07.10.08.01.	Anterior functional stenosis	disturbance of reticulo-omasal ingesta transport	DD						y	21 days
1.07.10.08.02.	Posterior functional stenosis	disturbance of abomasal ingesta transport	DD						y	21 days
1.07.10.09.	Hyperkeratosis ruminis (hyperkeratosis of ruminal epithelium)	excessive keratinization (keratin production) of the inner layer of the rumen	DD						y	21 days
1.07.10.10.	Parakeratosis ruminis (parakeratosis of ruminal epithelium)	disturbance of keratinization (keratin production) of the inner layer of the rumen	DD						y	21 days
1.07.10.11.	Reticulitis, Ruminitis, Reticuloruminitis nontraumatica	inflammation of reticulum and/or rumen unrelated to foreign material in the forestomach	DD						y	21 days
1.07.10.12.	Reticuloperitonitis traumatica	hardware disease, wire; traumatic inflammation of reticulum and abdominal membrane with foreign material in the forestomach	DD						y	21 days
1.07.11.	Diseases of the omasum		DD						y	21 days
1.07.11.01.	Omasitis	inflammation of the omasum	DD						y	21 days
1.07.11.02.	Obstipatio omasi, psalter paresis (constipation and immotility of the omasum)		DD						y	21 days
1.07.12.	Diseases of the abomasum		DD						y	21 days
1.07.12.01.	Abomasal tympany of calves	abomasal bloat of calves	DD			calf (mostly weaned calf)	0-32 weeks		y	21 days
1.07.12.02.	Abomasitis (inflammation of the abomasum)		DD						y	21 days
1.07.12.03.	Ulcus abomasi (abomasal ulceration)		DD						y	21 days
1.07.12.04.	Accumulation of sand in the abomasum		DD						y	21 days
1.07.12.05.	Dislocatio abomasi, Dilatatio et dislocatio abomasi (abomasal displacement)	lateral displacement of the distended abomasum in the abdomen	DD						y	21 days
1.07.12.05.01.	Dislocatio abomasi sinistra, Dilatatio et dislocation abomasi sinistra (left-side abomasal displacement)	displacement of the distended abomasum to the left side of the abdomen (between rumen and left abdominal wall)	DD						y	21 days
1.07.12.05.02.	Dilatatio abomasi simplex	simple dilatation of the abomasum without lateral displacement	DD						y	21 days
1.07.12.05.03.	Dislocatio abomasi dextra, Dilatatio et dislocatio abomasi dextra, Dilatatio et dislocatio abomasi dextra cum torsione (ride-side abomasal displacement without or with torsion)	displacement of the distended abomasum to the right side of the abdomen (between intestines and right abdominal wall) without or with torsion	DD						y	21 days
1.07.12.05.04.	Dislocatio abomasi dextra cum torsione (ride-side displacement and torsion of the abomasum)		DD						y	21 days
1.07.12.06.	Abomasal surgery		T	1.07.12.05.					y	21 days
1.07.12.06.01.	Abomasal surgery with roll-and-suture technique according to Hull	blind stitch; rolling method with percutaneous fixation of the abomasum	T	1.07.12.05.					y	21 days
1.07.12.06.02.	Percutaneous abomasopexia according to Sterner & Grymer	bar suture, toggle pin; rolling method with percutaneous fixation of the abomasum after gas removal via trocarisation	T	1.07.12.05.					y	21 days
1.07.12.06.03.	Laparoscopic abomasopexia according to Janowitz	minimally invasive surgical fixation of the abomasum	T	1.07.12.05.					y	21 days
1.07.12.06.04.	Medial omentopexia according to Numans	Utrechter method; left flank surgical technique with paramedian fixation of the abomasum	T	1.07.12.05.					y	21 days
1.07.12.06.05.	Lateral omentopexia according to Dirksen	right flank surgical technique with lateral fixation of the abomasum	T	1.07.12.05.					y	21 days
1.07.12.07.	Surgical removal of foreign material from the forestomach		T	1.07.10.12.					y	21 days
1.07.12.08.	Diagnostic laparotomy	abdominal surgery for diagnostic purposes	E	1.07.					y
1.07.13.	Diseases of the intestines		DD						y	21 days
1.07.13.01.	Enteritis (inflammation of the intestines)		DD						y	21 days
1.07.13.01.01.	Enteritis catarrhalis (catarrhal enteritis)	catarrhal inflammation of the intestines	DD						y	21 days
1.07.13.01.02.	Enteritis haemorrhagica (hemorrhagic enteritis)	hemorrhagic inflammation of the intestines	DD						y	21 days
1.07.13.01.03.	Enteritis pseudomembranacea (pseudomembraneous enteritis)	pseudomembraneous inflammation of the intestines	DD						y	21 days
1.07.13.01.04.	Enteritis necroticans (necrotic enteritis)	necrotic inflammation of the intestines	DD						y	21 days
1.07.13.01.05.	Diarrhea syndrome of calves (calf diarrhoea)		DD			calf	0-6 months		y	21 days
1.07.13.02.	Intestinal colic and ileus (intestinal obstruction)		DD						y	21 days
1.07.13.02.01.	Invaginatio intestini (intestinal invagination)		DD						y	21 days
1.07.13.02.02.	Incarceratio intestini (intestinal incarceration)		DD						y	21 days
1.07.13.02.03.	Volvulus intestini (intestinal volvulus)		DD						y	21 days
1.07.13.02.04.	Torsio mesenterialis intestini	mesenterial torsion of the intestines	DD						y	21 days
1.07.13.02.05.	Dilatatio caeci (cecal dilatation)		DD						y	21 days
1.07.13.02.06.	Dilatatio et torsio caeci	dilatation and torsion of the cecum	DD						y	21 days
1.07.13.02.07.	Ileus paralyticus (paralytic ileus)	ileus due to intestinal paralysis	DD						y	21 days
1.07.13.02.08.	Spasmus intestini (intestinal spasm)		DD						y	21 days
1.07.13.03.	Prolapsus ani et recti (prolapse of anus and rectum)		DD						y	21 days
1.07.14.	Diseases of mesenterium and peritoneum		DD						y	21 days
1.07.14.01.	Liponecrosis peritonealis	necrosis of adipose tissue in the abdominal cavity	DD						y	21 days
1.07.14.02.	Bursitis omentalis purulenta (omental empyema)	purulent inflammation of the omental bursa	DD						y	21 days
1.07.14.03.	Peritonitis	inflammation of the peritoneum	DD						y	21 days
1.07.14.04.	Hydrops ascites / Ascites	effusion of serous fluid in the abdominal cavity	DD						y	21 days
1.07.15.	Diseases of liver and biliary tracts		DD						y	21 days
1.07.15.01.	Icterus (jaundice)		DD						y	21 days
1.07.15.02.	Hepatic dystrophy / Hepatic failure		DD						y	21 days
1.07.15.03.	Hepatitis	inflammation of the liver	DD						y	21 days
1.07.15.04.	Hepatitis necroticans et apostematosa / Hepatic abscess		DD						y	21 days
1.07.15.05.	Cholecystitis et cholangitis	inflammation of gallbladder and biliary tracts	DD						y	21 days
1.07.15.06.	Hepatic photosensitive dermatitis	secondary photosensitization; light-induced inflammation of the skin due to liver dysfunction	DD						y	21 days
1.07.16.	Diseases of the pancreas		DD						y	21 days
1.07.16.01	Pancreatitis	inflammation of the pancreas	DD						y	21 days
1.07.99.	Other disorders of the digestive tract		DD						y	21 days
1.08.	Diseases of the urinary tract								y	21 days
1.08.00.	Examination of the urinary tract with no abnormality detected		E						y
1.08.01.	Hereditary diseases of the urinary tract		DD			calf	0-6 months		n
1.08.02.	Malformations of the urinary tract		DD			calf	0-6 months		n
1.08.02.01.	Fistula urachis (fistula of the urachus)	patent urachus; urinary fistula in the navel region	DD			calf	0-6 months		y	21 days
1.08.03.	Tumors of the urinary tract		DD						y	21 days
1.08.04.	Injuries of the urinary tract		DD						y	21 days
1.08.05.	Diseases of the kidneys		DD						y	21 days
1.08.05.01.	Haemoglobinuria	urinal excretion of haemoglobin	DD						y	21 days
1.08.05.02.	Haematuria	urinal excretion of blood	DD						y	21 days
1.08.05.03.	Insufficientia renum (renal insufficiency)	renal failure	DD						y	21 days
1.08.05.03.01.	Uremia		DD						y	21 days
1.08.05.03.02.	Amyloidosis renum (renal amyloidosis)	amyloidnephrosis	DD						y	21 days
1.08.05.04.	Nephritis	inflammation of the kidneys	DD						y	21 days
1.08.05.05.	Pyelonephritis	inflammation of the renal pelvis	DD						y	21 days
1.08.05.05.01.	Pyelonephritis purulenta	purulent inflammation of the renal pelvis	DD						y	21 days
1.08.06.	Diseases of the urinary bladder		DD						y	21 days
1.08.06.01.	Cystitis vesicae urinariae	inflammation of the urinary bladder	DD						y	21 days
1.08.06.01.01.	Haematuria vesicalis bovis chronica (chronic enzootic hematuria)	chronic urinary excretion of blood from the urinary bladder	DD						y	21 days
1.08.06.02.	Paralysis vesicae urinariae (paralysis of the urinary bladder)		DD						y	21 days
1.08.07.	Diseases of the urinary tract collection system		DD						y	21 days
1.08.07.01.	Constriction in the urinary tract collection system		DD						y	21 days
1.08.07.02.	Urolithiasis	formation of urinary calculi	DD						y	21 days
1.08.99.	Other disorders of the urinary tract		DD						y	21 days
1.09.	Diseases of the locomotory apparatus								y	21 days
1.09.00.	Examination of the locomotory apparatus with no abnormality detected		E						y
1.09.01.	Hereditary diseases of the locomotory apparatus		DD			calf	0-6 months		n
1.09.01.01.	Paresis spastica posterior (inherited spastic paresis)	"Elso-heel"; spasticity / incomplete paralysis of the hind limb with extension of stifle and tarsal joints	DD			calf	0-6 months		n
1.09.01.02.	Hyena disease	premature physeal closure with lagging growth of the hind limbs	DD			calf	0-6 months		n
1.09.01.03.	Dwarfism		DD			calf	0-6 months		n
1.09.02.	Malformations of the locomotory apparatus		DD			calf	0-6 months		n
1.09.02.01.	Contracted flexor tendons	flexor tendon contracture	DD			calf	0-6 months		n
1.09.03.	Tumors of the locomotory apparatus		DD						y	21 days
1.09.04.	Injuries of the locomotory apparatus		DD						y	21 days
1.09.05.	Lameness		DD						y	21 days
1.09.05.01.	Supporting leg lameness		DD						y	21 days
1.09.05.02.	Swinging leg lameness		DD						y	21 days
1.09.05.03.	Mixed lameness		DD						y	21 days
1.09.06.	Diseases of the bones		DD						y	21 days
1.09.06.01.	Bone fissure		DD						y	21 days
1.09.06.02.	Bone fracture		DD						y	21 days
1.09.06.02.01.	Fractura ossis coxae (fracture of the pelvic bones)		DD						y	21 days
1.09.06.03.	Periostitis	inflammation of the periosteum	DD						y	21 days
1.09.06.04.	Osteomyelitis	inflammation of the bone marrow	DD						y	21 days
1.09.07.	Diseases of the joints		DD						y	21 days
1.09.07.01.	Arthrosis (degenerative joint disease)		DD						y	21 days
1.09.07.02.	Arthritis	inflammation of joints	DD						y	21 days
1.09.07.02.01.	Polyarthritis	inflammation of multiple joints	DD						y	21 days
1.09.07.02.02.	Gonitis	inflammation of the knee joint	DD						y	21 days
1.09.07.02.03.	Tarsitis	inflammation of the ankle joint	DD						y	21 days
1.09.07.02.04.	Carpitis	inflammation of the carpal joint	DD						y	21 days
1.09.07.03.	Periarthritis	inflammation of the tissues surrounding some joint	DD						y	21 days
1.09.07.03.01.	Peritarsitis	inflammation of the tissues surrounding the ankle joint	DD						y	21 days
1.09.07.03.02.	Pericarpitis	inflammation of the tissues surrounding the carpal joint	DD						y	21 days
1.09.07.04.	Distorsion		DD						y	21 days
1.09.07.05.	Subluxation	incomplete luxation	DD						y	21 days
1.09.07.06.	Luxation		DD						y	21 days
1.09.07.06.01.	Luxatio patellae (luxation of the patella)		DD						y	21 days
1.09.08.	Diseases of synovial bursae		DD						y	21 days
1.09.08.01.	Bursal hygroma	fluid accumulation in synovial bursae	DD						y	21 days
1.09.08.02.	Bursitis	inflammation of synovial bursae	DD						y	21 days
1.09.08.02.01.	Bursitis praecarpalis (precarpal bursitis)	carpal bursitis, carpal hygroma; inflammation of the synovial bursa on the dorsal aspect of the carpal joint	DD						y	21 days
1.09.08.02.02.	Bursitis tarsalis (tarsal bursitis)	inflammation of the synovial bursa located on the lateral aspect of the tarsal joint	DD						y	21 days
1.09.08.02.03.	Bursitis calcanei	inflammation of the synovial bursa located at the rear aspect of the heel bone	DD						y	21 days
1.09.09.	Diseases of the tendons		DD						y	21 days
1.09.09.01.	Tendinitis	inflammation of tendons	DD						y	21 days
1.09.09.02.	Tendovaginitis	inflammation of synovial sheaths of tendons	DD						y	21 days
1.09.09.03.	Tendon rupture		DD						y	21 days
1.09.09.04.	Tendon necrosis		DD						y	21 days
1.09.09.04.01.	Necrosis of the deep digital flexor tendon		DD						y	21 days
1.09.09.05.	Acquired contracted tendons in calves		DD			calf	0-6 months		y	21 days
1.09.10.	Diseases of the muscles		DD						y	21 days
1.09.10.01.	Myositis	inflammation of muscles	DD						y	21 days
1.09.10.02.	Muscle rupture		DD						y	21 days
1.09.10.02.01.	Ruptura musculorum adductores (rupture of the adductor muscles)		DD						y	21 days
1.09.10.03.	Muscle necrosis		DD						y	21 days
1.09.10.03.01.	Ischemic necrosis of femoral muscles	necrosis of femoral muscles due to insufficient blood supply	DD						y	21 days
1.09.11.	Diseases of peripheral nerves		DD						y	21 days
1.09.11.01.	Neuritis	inflammation of peripheral nerves	DD						y	21 days
1.09.11.02.	Paralysis of peripheral nerves		DD						y	21 days
1.09.11.02.01.	Contusio nervi plexus lumbalis et sacralis (contusion of pelvic nerves)		DD						y	21 days
1.09.11.02.02.	Paralysis nervi obturatorii (obturator paralysis)		DD						y	21 days
1.09.11.02.03.	Paralysis nervi ischiadici (sciatic paralysis)		DD						y	21 days
1.09.11.02.04.	Paralysis nervi femoralis (femoral paralysis)		DD						y	21 days
1.09.11.02.05.	Paralysis nervi tibialis (tibial paralysis)		DD						y	21 days
1.09.11.02.06.	Paralysis nervi radialis (radial paralysis)		DD						y	21 days
1.09.11.02.07.	Paralysis nervi fibularis (fibular paralysis)		DD						y	21 days
1.09.99.	Other disorders of peripheral nerves		DD						y	21 days
1.10.	Claw diseases								y	28 days
1.10.00.	Examination of the claws with no abnormality detected		E						y
1.10.01.	Inherited diseases of the claws		DD			calf	0-6 months		n
1.10.02.	Malformations of the claws		DD			calf	0-6 months		n
1.10.03.	Tumors of the claws		DD						y	28 days
1.10.04.	Injuries of the claws		DD						y	28 days
1.10.04.01.	Foreign bodies penetrating the claw capsule		DD						y	28 days
1.10.05.	Claw deformations		DD						y	28 days
1.10.05.01.	Simple horn overgrowth	overgrowth at the toe; claws with abnormally long anterior and lateral walls	DD						y	28 days
1.10.05.02.	Negative net growth of hoof horn	claws with shallow heel and abnormally short anterior and lateral walls	DD						y	28 days
1.10.05.03.	Stubbed toe	claws with steep front angle and equal height of walls at toe and heels	DD						y	28 days
1.10.05.04.	Corkscrew claw	claws with inwardly twisted toe and lateral walls cylindrically overgrowing the sole	DD						y	28 days
1.10.05.05.	Diverging claws	claws with wide divergence of toes during normal loading	DD						y	28 days
1.10.05.06.	Scissor claw	claws with inwardly twisted and crossing toes	DD						y	28 days
1.10.06.	Non-purulent claw diseases		DD						y	28 days
1.10.06.01.	Horny pillar	circumscribed cylindric or bar-shaped horny outgrowth at the inner wall of the claw capsule	DD						y	28 days
1.10.06.02.	Vertical fissures in the claw capsule	vertical sandcrack	DD						y	28 days
1.10.06.03.	Horizontal fissures in the claw capsule	horizontal sandcrack	DD						y	28 days
1.10.06.04.	White line disease	widening and separation of the white line of the claw	DD						y	28 days
1.10.06.05.	Loosening of parts of the claw walls	laminar loosening of wall horn from the sole parallel to the weight-bearing surface	DD						y	28 days
1.10.06.06.	Separations of parts of the claw walls	laminar separation between wall horn and underlying corium of the claw	DD						y	28 days
1.10.06.07.	Double sole	under-run sole; doubling of the sole with cavity between new sole horn and covering false sole	DD						y	28 days
1.10.06.08.	Pododermatitis nonpurulenta circumscripta	circumscribed non-purulent inflammation of the corium of the claws	DD						y	28 days
1.10.06.09.	Pododermatitis nonpurulenta diffusa (laminitis)	diffuse non-purulent inflammation of the corium of the claws	DD						y	28 days
1.10.06.09.01.	Pododermatitis nonpurulenta diffusa acuta (acute laminitis)	acute diffuse non-purulent inflammation of the corium of the claws	DD						y	28 days
1.10.06.09.02.	Pododermatitis nonpurulenta diffusa chronica (chronic laminitis)	chronic diffuse non-purulent inflammation of the corium of the claws	DD						y	28 days
1.10.06.10.	Hyperplasia interdigitalis (interdigital hyperplasia)	corns	DD						y	28 days
1.10.06.11.	Tendovaginitis flexorum digitalis nonpurulenta (non-purulent inflammation of the common digital flexor tendon sheath)		DD						y	28 days
1.10.06.12.	Distortion of interdigital joints	distortion of pedal or coronar joint	DD						y	28 days
1.10.06.13.	Fracture of third or second phalanx		DD						y	28 days
1.10.06.13.01.	Fracture of the distal (third) phalanx	pedal bone fracture	DD						y	28 days
1.10.07.	Purulent claw diseases		DD						y	28 days
1.10.07.01.	Pododermatitis circumscripta purulenta	circumscribed purulent inflammation of the corium of the claws	DD						y	28 days
1.10.07.02.	Pododermatitis diffusa purulenta	diffuse purulent inflammation of the corium of the claws	DD						y	28 days
1.10.07.03.	Pododermatitis solearis circumscripta purulenta et necroticans chronica (sole ulcer)	circumscribed chronic purulent and necrotizing inflammation of the corium of the claws	DD						y	28 days
1.10.07.03.01.	Pododermatitis solearis circumscripta purulenta et necroticans chronica (toe ulcer)	circumscribed chronic purulent and necrotizing inflammation of the corium of the claws at the toe	DD
1.10.07.03.02.	Pododermatitis solearis circumscripta purulenta et necroticans chronica (Rusterholz ulcers)	sole ulcers in the typical location; circumscribed chronic purulent and necrotizing inflammation of the corium of the claws between heel and sole horn close to the axial wall, mainly in the outer claws of the hind limbs	DD						y	28 days
1.10.07.03.03.	Pododermatitis solearis circumscripta purulenta et necroticans chronica in atypical location	sole ulcers in atypical location; circumscribed chronic purulent and necrotizing inflammation of the corium of the claws neither at the toe nor in the typical location (i.e. between heel and sole horn close to the axial wall, mainly in the outer claws of the hind limbs)	DD						y	28 days
1.10.07.06.	Pododermatitis septica circumscripta abaxialis	circumscribed infectious purulent inflammation of the corium underlying the wall horn with separation of parts of the claw walls	DD						y	28 days
1.10.07.07.	Necrosis interdigitalis (interdigital necrosis)	interdigital necrobacillosis, foul (foul of the foot), foot-rot; infectious purulent and necrotizing inflammation of interdigital tissue	DD						y	28 days
1.10.07.08.	Digital phlegmon	panaritium; digital inflammatory edema	DD						y	28 days
1.10.07.08.01.	Coronary digital phlegmon	coronary panaritium; digital inflammatory edema along the coronary band	DD						y	28 days
1.10.07.08.02.	Heel phlegmon	heel panaritium; digital inflammatory edema at the heels	DD						y	28 days
1.10.07.08.03.	Interdigital phlegmon	footrot, interdigital panaritium; inflammatory edema in the interdigital space	DD						y	28 days
1.10.07.09.	Heel erosion	slurry heel; necrosis of horn at the heels and in the rear third of the sole	DD						y	28 days
1.10.07.10.	Dermatitis digitalis (digital dermatitis)	hairy warts (papillomateous digital dermatitis, PDD), Mortellaro disease; infectious inflammation of the digital skin with epidermal lesions of strawberry-like appearance	DD						y	28 days
1.10.07.11.	Dermatitis interdigitalis (interdigital dermatitis, IDD)	stable foot-rot, scald (foot scald); infectious inflammation of the skin in the interdigital cleft	DD						y	28 days
1.10.07.12.	Necrosis of the distal phalanx	toe necrosis, osteomyelitis of distal phalanx; degradation of the pedal bone	DD						y	28 days
1.10.07.13.	Necrosis of the distal end of the deep digital flexor tendon		DD						y	28 days
1.10.07.14.	Purulent inflammation of the common digital flexor tendon sheath		DD						y	28 days
1.10.07.15.	Purulent inflammation of the distal interdigital joint		DD						y	28 days
1.10.07.16.	Purulent inflammation of the proximal interphalangeal joint		DD						y	28 days
1.10.08.	Amputation of claws		T	1.10.					n
1.10.09.	Resection of the distal end of the deep digital flexor tendon	surgical removal of the distal end of the deep digital flexor tendon	T	1.10.					n
1.10.10.	Resection of the distal interphalangeal joint	surgical removal of the distal interphalangeal joint	T	1.10.					n
1.10.11.	Not fixable in claw treatment crush because of medical reasons		DD	EX					y
1.10.99.	Other disorders of the claws		DD						y	21 days
1.11.	Diseases of the central nervous system and the sensory organs								y	21 days
1.11.00.	Examination of the central nervous system and the sensory organs		E						y
1.11.01.	Inherited diseases of the central nervous system and the sensory organs		DD			calf	0-6 months		n
1.11.02.	Malformation of the central nervous system and the sensory organs		DD			calf	0-6 months		n
1.11.02.01.	Hydrocephalus		DD			suckling calf	0-12 weeks		n
1.11.02.02.	Cerebellar hypoplasia (hypoplasia of the cerebellum)	"Hereford disease"; underdevelopment of the cerebellum	DD			calf	0-12 weeks		n
1.11.02.03.	Microphthalmia	inherited underdevelopment of the eye	DD			calf	0-12 months		n
1.11.02.04.	Dermoid		DD			calf	0-12 months		n
1.11.02.05.	Strabismus convergens congenitus (congenital convergent strabismus)	congenital esotropia, congenital convergent squint	DD						n
1.11.03.	Tumors of the central nervous system and the sensory organs		DD						y	21 days
1.11.04.	Injuries of the central nervous system and the sensory organs		DD						y	21 days
1.11.05.	Diseases of the brain		DD						y	21 days
1.11.05.01.	Meningoencephalitis	inflammation of the brain and the meninges	DD						y	21 days
1.11.05.01.01.	Sporadic bovine encephalomyelitis		DD						y	21 days
1.11.05.01.02.	Syndrome relating to abscess at the base of the brain		DD						y	21 days
1.11.06.	Diseases of the spinal cord		DD						y	21 days
1.11.06.01.	Myelitis	inflammation of the spinal cord	DD						y	21 days
1.11.06.01.01.	Meningoencephalomyelitis purulenta (purulent meningoencephalomyelitis)	purulent inflammation of the brain, the spinal cord and the meninges	DD						y	21 days
1.11.06.01.02.	Cauda equina neuritis (paralysis of tail muscles and sphincter muscles of anus and urinary bladder)		DD						y	21 days
1.11.07.	Eye diseases		DD						y	21 days
1.11.07.01.	Conjunctivitis	inflammation of the conjunctiva	DD						y	21 days
1.11.07.02.	Keratitis	inflammation of the cornea	DD						y	21 days
1.11.07.03.	Iridocyclitis (anterior uveitis)	inflammation of the uvea	DD						y	21 days
1.11.07.04.	Chorioiditis	inflammation of the chorioid membrane	DD						y	21 days
1.11.07.05.	Cataracta lentis	opacity of the lens	DD						y	21 days
1.11.07.06.	Amaurosis	complete blindness	DD						y	21 days
1.11.07.07.	Ablatio retinae (ablation of the retina)	detachment of the retina	DD						y	21 days
1.11.07.08.	Diseases of the eye bulb		DD						y	21 days
1.11.07.08.01.	Strabismus	squint	DD						y	21 days
1.11.07.08.02.	Nystagmus	nystagmoid movement of the globe	DD						y	21 days
1.11.07.08.03.	Protrusio bulbi (exophthalmus)	protrusion of the eye bulb	DD						y	21 days
1.11.07.08.04.	Enophthalamus	retraction of the eye bulb	DD						y	21 days
1.11.07.08.05.	Panophthalmia	inflammation of all parts of the eye	DD						y	21 days
1.11.07.09.	Exenteratio bulbi (surgical removal of the eye bulb)		T	1.11.07.					y	21 days
1.11.07.10.	Evisceratio (surgical removal of the eye)		T	1.11.07.					y	21 days
1.11.08.	Ear diseases		DD						y	21 days
1.11.08.01.	Othematom (ear hematoma)		DD						y	21 days
1.11.08.02.	Otitis externa (external otitis)	inflammation of the ear canal / outer auditory meatus	DD						y	21 days
1.11.08.03.	Otitis media	inflammation of the middle ear	DD						y	21 days
1.11.08.04.	Otitis interna	inflammation of the inner ear	DD						y	21 days
1.11.99.	Other disorders of the central nervous system and the sensory organs		DD						y	21 days
1.12.	Diseases of the udder (other than mastitis)				f				y	21 days
1.12.00.	Examination of the udder with no abnormality detected		E		f				y
1.12.01.	Inherited diseases of the udder		DD		f	calf	0-6 months		n
1.12.02.	Malformations of the udder		DD		f	calf	0-6 months		n
1.12.03.	Atrophy of the udder		DD		f	LACT	from 18 months		y	21 days
1.12.04.	Deformations of the udder		DD		f				y	21 days
1.12.04.01.	Abnormal shape of the udder		DD		f				n
1.12.05.	Tumors of the udder		DD		f				y	21 days
1.12.06.	Injuries of the udder		DD		f				y	21 days
1.12.06.01.	Udder hematoma		DD		f				y	21 days
1.12.06.02.	Teat injuries		DD		f				y	21 days
1.12.06.03.	Injuries of the body of the mammary gland		DD		f				y	21 days
1.12.06.04.	Foreign material in the mammary gland		DD		f				y	21 days
1.12.06.05.	Teat fistula		DD		f	LACT	from 18 months		y	21 days
1.12.06.06.	Teat end hyperkeratosis		DD		f	LACT	from 18 months		y	21 days
1.12.07.	Diseases of the skin and subcutis of the udder		DD		f				y	21 days
1.12.07.01.	Udder exanthema (symptomatic skin rash at the udder)	skin rash at the udder accompanying an eruptive disease or fever	DD		f				y	21 days
1.12.07.01.01.	Nutritional udder exanthema	feeding-related skin rash at the udder	DD		f				y	21 days
1.12.07.01.02.	Allergic udder exanthema	allergic skin rash at the udder	DD		f				y	21 days
1.12.07.02.	Udder eczema	idiopathic skin rash at the udder	DD		f				y	21 days
1.12.07.02.01.	Udder acne	udder impetigo; purulent inflammation of hair follicles and sebaceous glands at the udder	DD		f				y	21 days
1.12.07.03.	Dermatitis uberis (dermatitis at the udder)	inflammation of the skin at the udder	DD		f				y	21 days
1.12.07.03.01.	Dermatitis at the lateral udder and the medial thigh	intertrigo, lateral udder sores; necrotic inflammation of the skin at the lateral aspects of the udder and the medial aspect of the thigh	DD		f	LACT	from 18 months		y	21 days
1.12.07.03.02.	Dermatitis at the medial forequarters of the udder	anterior udder sores; necrotic inflammation of the skin at the anterior portion of the udder between the forequarters and adjacent abdominal skin	DD		f				y	21 days
1.12.07.03.03.	Udder furunculosis	disseminated deep purulent inflammation of hair follicles and sebaceous glands at the udder	DD						y	21 days
1.12.07.03.04.	Pseudocowpox (paravaccinia)	"milker's nodes"; infection with Parapoxvirus bovis 2	DD		f				y	21 days
1.12.07.04.	Udder edema	accumulation of serous fluid in the udder tissue	DD		f	LACT	from 18 months		y	21 days
1.12.07.04.01.	Prepartal udder edema	udder edema before parturition, calving-related accumulation of serous fluid in the udder tissue	DD		f	PART	from 18 months	21 days a.p. - 21 days p.p.	y	21 days
1.12.07.04.02.	Chronic udder edema (recurrent udder edema)	chronic and repeated accumulation of serous fluid in the udder tissue	DD		f	LACT	from 18 months		y	21 days
1.12.08.	Disturbance of milk flow		DD		f	LACT	from 18 months		y	21 days
1.12.08.01.	Bloody milk	blood-contamination of milk due to intra-mammary rupture of blood vessels	DD		f	LACT	from 18 months		y	21 days
1.12.08.02.	Failure of milk ejection		DD		f	LACT	from 18 months		y	21 days
1.12.08.03.	Disorders of the ducts of the udder		DD		f	LACT	from 18 months		y	21 days
1.12.08.03.01.	Galactophoritis	inflammation of the ducts of the udder	DD		f	LACT	from 18 months		y	21 days
1.12.08.03.02.	Teat stenosis	stenoses in the ducts of the udder	DD		f	LACT	from 18 months		y	21 days
1.12.08.03.03.	Disorders of the streak canal of the teat		DD		f	LACT	from 18 months		y	21 days
1.12.09.	Teat endoscopy		E	1.12.08.	f				y
1.12.99.	Other disorders of the udder (except mastitis)		DD		f				y	21 days
1.13.	Mastitis (inflammation of the mammary gland)				f	LACT	from 18 months		y	14 days
1.13.01.	Mastitis - descriptive	mastitis by type of inflammatory signs	DD		f	LACT	from 18 months		y	14 days
1.13.01.01.	Disturbance of milk secretion	non-infectious increase of somatic cells in the milk	DD		f	LACT	from 18 months		y	14 days
1.13.01.02.	Mastitis catarrhalis acuta (acute catarrhal mastitis)		DD		f	LACT	from 18 months		y	14 days
1.13.01.03.	Mastitis catarrhalis chronica (chronic catarrhal mastitis)		DD		f	LACT	from 18 months		y	14 days
1.13.01.04.	Mastitis haemorrhagica (hemorrhagic mastitis)	inflammation of the mammary gland with bleeding and blood-admixture to the milk	DD		f	LACT	from 18 months		y	14 days
1.13.01.05.	Mastitis necrotica (necrotizing mastitis)	inflammation of the mammary gland with tissue necrosis and admixture of putrid tissue to the milk	DD		f	LACT	from 18 months		y	14 days
1.13.01.06.	Mastitis apostematosa (purulent mastitis)	inflammation of the mammary gland with abscess formation and purulent tissue degradation	DD		f	LACT	from 18 months		y	14 days
1.13.01.07.	Mastitis interstitialis non purulenta (non-purulent interstitial mastitis)	non-purulent inflammation of the connective tissue of the mammary gland	DD		f	LACT	from 18 months		y	14 days
1.13.01.08.	Mastitis granulomatosa (granulomatous mastitis)	inflammation of the mammary gland with granulomatous tissue degradation	DD		f	LACT	from 18 months		y	14 days
1.13.01.09.	Mastitis phlegmonosa / Mastitis acuta gravis (phlegmonous mastitis)	severe inflammation of the mammary gland with necrosis of secretory tissue and extensive accumulation of serous fluid in the udder	DD		f	LACT	from 18 months		y	14 days
1.13.01.10.	Mastitis catarrhalis subclinica (subclinical mastitis)	infectious inflammation of the mammary gland without clinical signs	DD		f	LACT	from 18 months		y	14 days
1.13.02.	Mastitis - etiological	Inflammation of the udder - with isolation of pathogenic agents	CD		f	LACT	from 18 months		y	14 days
1.13.02.01.	Mastitis with isolation of Streptococci (Sc.)		CD		f	LACT	from 18 months		y	14 days
1.13.02.01.01.	Mastitis with isolation of Sc. agalactiae (ScB)		CD		f	LACT	from 18 months		y	14 days
1.13.02.01.02.	Mastitis with isolation of Sc. dysgalactiae (ScC)		CD		f	LACT	from 18 months		y	14 days
1.13.02.01.03.	Mastitis with isolation of Sc. uberis (ScE)		CD		f	LACT	from 18 months		y	14 days
1.13.02.01.04.	Mastitis with isolation of other Streptococci		CD		f	LACT	from 18 months		y	14 days
1.13.02.02.	Mastitis with isolation of Micrococci		CD		f	LACT	from 18 months		y	14 days
1.13.02.02.01.	Mastitis with isolation of Staphylococcus aureus (St. aureus)		CD		f	LACT	from 18 months		y	14 days
1.13.02.02.02.	Mastitis with isolation of coagulase-negative Staphylococci (KNS)		CD		f	LACT	from 18 months		y	14 days
1.13.02.02.03.	Mastitis with isolation of other Micrococci		CD		f	LACT	from 18 months		y	14 days
1.13.02.03.	Mastitis with isolation of Enterobacteria		CD		f	LACT	from 18 months		y	14 days
1.13.02.03.01.	Mastitis with isolation of Escherichia coli (E. coli)		CD		f	LACT	from 18 months		y	14 days
1.13.02.03.02.	Mastitis with isolation of Klebsiellae		CD		f	LACT	from 18 months		y	14 days
1.13.02.03.03.	Mastitis with isolation of other Enterobacteria		CD		f	LACT	from 18 months		y	14 days
1.13.02.04.	Mastitis with isolation of Arcanobacterium pyogenes (A. pyogenes)		CD		f	LACT	from 18 months		y	14 days
1.13.02.05.	Mastitis with isolation of Pseudomonas aeroginosa		CD		f	LACT	from 18 months		y	14 days
1.13.02.06.	Mastitis with isolation of Mycobacteria (Mycobacterium spp.)		CD		f	LACT	from 18 months		y	14 days
1.13.02.06.01.	Udder tuberculosis	inflammation of the mammary gland after infection with Mycobacterium bovis or Mycobacterium tuberculosis	CD		f	LACT	from 18 months		y	14 days
1.13.02.06.02.	Atypic mycobacteriosis	inflammation of the mammary gland after infection with atypic Mycobacteria, e.g., of M. avium group	CD		f	LACT	from 18 months		y	14 days
1.13.02.07.	Mastitis with isolation of Nocardiae		CD		f	LACT	from 18 months		y	14 days
1.13.02.08.	Mastitis with isolation of Mycoplasmae		CD		f	LACT	from 18 months		y	14 days
1.13.02.09.	Mastitis with isolation of yeasts		CD		f	LACT	from 18 months		y	14 days
1.13.02.10.	Mastitis with isolation of Protothecae (Algae mastitis)		CD		f	LACT	from 18 months		y	14 days
1.13.02.11.	Mastitis with isolation of other pathogenic agents		CD		f	LACT	from 18 months		y	14 days
1.13.99.	Other inflammations of the udder		CD		f				y	14 days
2.	Reproduction disorders in females		CD		f				y	21 days
2.01.	Diseases of the female reproductive system				f				y	21 days
2.01.00.	Examination of the female reproductive system with no abnormality detected		E		f				y
2.01.01.	Inherited diseases of the female reproductive system		DD		f	heifer	12-24 months		n
2.01.02.	Malformations of the female reproductive system		DD		f	heifer	12-24 months		n
2.01.02.01.	Freemartinism		DD		f	heifer	12-24 months		n
2.01.02.02.	Genital malformations in females		DD		f	heifer	12-24 months		n
2.01.02.03.	Infantilism in females		DD		f	heifer	12-24 months		n
2.01.02.04.	Tissue junctions in the vagina		DD		f	heifer	12-24 months		n
2.01.02.05.	Hypoplasia of the ovaries	underdevelopment of the ovaries	DD		f	heifer	12-24 months		n
2.01.03.	Tumors of the female reproductive system		DD		f				y	21 days
2.01.04.	Injuries of the female reproductive system		DD		f				y	21 days
2.01.05.	Diseases of the vulva		DD		f				y	21 days
2.01.05.01.	Insufficient closure of the vulva		DD		f				y	21 days
2.01.06.	Diseases of the vagina		DD		f				y	21 days
2.01.06.01.	Pneumovagina	accumulation of air in the vagina due to insufficient closure	DD		f				y	21 days
2.01.06.02.	Prolaps vaginae (vaginal prolapse)		DD		f				y	21 days
2.01.06.03.	Vaginitis	inflammation of the vagina	DD		f				y	21 days
2.01.07.	Diseases of the cervix uteri	diseases of the neck of the uterus	DD		f				y	21 days
2.01.07.01.	Cervicitis	inflammation of the cervix	DD		f				y	21 days
2.01.08.	Diseases of the uterus		DD		f				y	21 days
2.01.09.	Diseases of the fallopian tube / oviduct		DD		f				y	21 days
2.01.09.01.	Salpingitis	inflammation of the fallopian duct / oviduct	DD		f				y	21 days
2.01.10.	Diseases of the ovaries		DD		f				y	21 days
2.01.99.	Other disorders of the female reproductive system		DD		f				y	21 days
2.02.	Pregnancy disorders				f	PART	from 18 months		yT / nL
2.02.00.	Examination for pregnancy disorders with no abnormality detected		E		f	PART	from 18 months		y
2.02.01.	Disorders of the fetal membranes and the amniotic fluid		DD		f	PART	from 18 months		yT / nL
2.02.01.01.	Hydrops amnii et allantii (hydrops of amnion and allantois)	effusion of fluid in and between fetal membranes	DD		f	PART	from 18 months		yT / nL
2.02.01.01.01.	Hydrallantois	effusion of fluid in the allantois, i.e. the fetal urinary bladder	DD		f	PART	from 18 months		yT / nL
2.02.01.01.02.	Hydramnion	effusion of fluid in the amnion, i.e. the inner fetal membrane	DD		f	PART	from 18 months		yT / nL
2.02.02.	Disorders of embryonal and fetal development		DD		f	PART	from 18 months		yT / nL
2.02.02.01.	Premature termination of pregnancy (reproductive loss)		DD		f	PART	from 18 months		yT / nL
2.02.02.01.01.	Embryonic death	reproductive loss until day 50 of pregnancy	DD		f	PART	from 18 months		yT / nL
2.02.02.01.02.	Fetal mummification	reproductive loss with desiccated fetus	DD		f	PART	from 18 months		yT / nL
2.02.02.01.03.	Fetal maceration	reproductive loss with macerated fetus	DD		f	PART	from 18 months		yT / nL
2.02.02.01.04.	Fetal emphysema	reproductive loss with putrid gas accumulation	DD		f	PART	from 18 months		yT / nL
2.02.02.02.	Abortion		DD		f	PART	from 18 months		yT / nL
2.02.02.02.01.	Abortus immaturus (early abortion)	abortion before day 210 of pregnancy	DD		f	PART	from 18 months		yT / nL
2.02.02.02.02.	Abortus praematurus (late abortion)	premature calving; abortion after day 210 of pregnancy	DD		f	PART	from 18 months	from 250 days p.p.	yT / nL
2.02.02.03.	Graviditatis prolongata (prolonged gestation)	duration of pregnancy > 290 days	DD		f	PART	from 18 months		yT / nL
2.02.03.	Termination of pregnancy		T	2.02.	f	PART	from 18 months		yT / nL
2.02.99.	Other disorders of pregnancy		DD		f	PART	from 18 months		yT / nL
2.03.	Diseases related to calving		DD		f	PART	from 18 months	7 days a.p. - 7 days p.p.	yT / nL
2.03.00.	Examination for calving-related diseases with no abnormality detected		E		f	PART	from 18 months	7 days a.p. - 7 days p.p.	y
2.03.01.	Parturition disorders		DD		f	PART	from 18 months	7 days a.p. - 7 days p.p.	yT / nL
2.03.01.01.	Dystocia	calving difficulties	DD		f	PART	from 18 months	7 days a.p. - 7 days p.p.	yT / nL
2.03.01.01.01.	Absolute oversize of the calf		DD		f	PART	from 18 months	7 days a.p. - 7 days p.p.	yT / nL
2.03.01.01.02.	Relative oversize of the calf		DD		f	PART	from 18 months	7 days a.p. - 7 days p.p.	yT / nL
2.03.01.02.	Stillbirth	delivery of a dead calf	DD		f	PART	from 18 months	7 days a.p. - 7 days p.p.	yT / nL
2.03.01.03.	Teratism		DD		f	PART	from 18 months	7 days a.p. - 7 days p.p.	yT / nL
2.03.01.04.	Calf with anomalies		DD		f	PART	from 18 months	7 days a.p. - 7 days p.p.	yT / nL
2.03.02.	Labour disorders		DD		f	PART	from 18 months	7 days a.p. - 7 days p.p.	yT / nL
2.03.02.01.	Bradytocia (tedious labour)		DD		f	PART	from 18 months	7 days a.p. - 7 days p.p.	yT / nL
2.03.02.02.	Excessive labour		DD		f	PART	from 18 months	7 days a.p. - 7 days p.p.	yT / nL
2.03.03.	Narrowness of the female reproductive tract		DD		f	PART	from 18 months	7 days a.p. - 7 days p.p.	yT / nL
2.03.04.	Preterm rupture of the fetal membranes		DD		f	PART	from 18 months	7 days a.p. - 7 days p.p.	yT / nL
2.03.05.	Irregular position of the calf		DD		f	PART	from 18 months	7 days a.p. - 7 days p.p.	yT / nL
2.03.05.01.	Irregular posture of the calf	deviation from extended posture, i.e. calf lying with flexed extremities	DD		f	PART	from 18 months	7 days a.p. - 7 days p.p.	yT / nL
2.03.05.02.	Irregular position of the calf	deviation from upper position, i.e. calf not lying with vertebral axis up	DD		f	PART	from 18 months	7 days a.p. - 7 days p.p.	yT / nL
2.03.05.03.	Irregular presentation of the calf	deviation from anterior or posterior presentation, i.e. no parallelism of longitudinal axes of cow and calf	DD		f	PART	from 18 months	7 days a.p. - 7 days p.p.	yT / nL
2.03.06.	Uterine diseases related to calving		DD		f	PART	from 18 months	7 days a.p. - 7 days p.p.	yT / nL
2.03.06.01.	Torsio uteri (uterine torsion)		DD		f	PART	from 18 months	7 days a.p. - 7 days p.p.	yT / nL
2.03.07.	Obstetric intervention		T	2.03.	f	PART	from 18 months	7 days a.p. - 7 days p.p.	yT / nL
2.03.08.	Medical induction of labour		T	2.03.	f	PART	from 18 months	7 days a.p. - 7 days p.p.	yT / nL
2.03.09.	Fetotomy		T	2.03.	f	PART	from 18 months	7 days a.p. - 7 days p.p.	yT / nL
2.03.10.	Sectio caesarea		T	2.03.	f	PART	from 18 months	7 days a.p. - 7 days p.p.	yT / nL
2.03.99.	Other calving disorders		DD		f	PART	from 18 months	7 days a.p. - 7 days p.p.	yT / nL
2.04.	Disorders in the postpartal period		DD		f	PART	from 18 months	0-50 days p.p.	yT / nL
2.04.00.	Puerperal control with no abnormality detected		E		f	PART	from 18 months	0-50 days p.p.	y
2.04.01.	Calving-related injuries of the reproductive system		DD		f	PART	from 18 months	0-50 days p.p.	yT / nL
2.04.01.01.	Calving-related injuries of the vulva		DD		f	PART	from 18 months	0-50 days p.p.	yT / nL
2.04.01.02.	Calving-related injuries of the vagina		DD		f	PART	from 18 months	0-50 days p.p.	yT / nL
2.04.01.03.	Calving-related injuries of the cervix		DD		f	PART	from 18 months	0-50 days p.p.	yT / nL
2.04.01.04.	Calving-related injuries of the uterus		DD		f	PART	from 18 months	0-50 days p.p.	yT / nL
2.04.01.05.	Perineal laceration		DD		f	PART	from 18 months	0-50 days p.p.	yT / nL
2.04.02.	Prolaps uteri (uterine prolapse)		DD		f	PART	from 18 months	0-50 days p.p.	yT / nL
2.04.03.	Retentio secundinarum (retained placenta)	retained fetal membranes	DD		f	PART	from 18 months	0-50 days p.p.	yT / nL
2.04.04.	Atonia uteri (atony of the uterus)		DD		f	PART	from 18 months	0-50 days p.p.	yT / nL
2.04.05.	Puerperal diseases	disturbance of regeneration of the female reproductive tract after calving during clinical puerperium, i.e. until day 21 p.p.	DD		f	PART	from 18 months	0-50 days p.p.	yT / nL
2.04.05.01.	Lochiometra	postpartum secretion retention	DD		f	PART	from 18 months	0-50 days p.p.	yT / nL
2.04.05.02.	Metritis	inflammation of all layers of the uterine wall	DD		f	PART	from 18 months	0-50 days p.p.	yT / nL
2.04.05.03.	Puerperal poisoning	infection of the lochia with fever and general signs of disease	DD		f	PART	from 18 months	0-50 days p.p.	yT / nL
2.04.05.04.	Puerperal septicemia	general infection due to infection of the lochia	DD		f	PART	from 18 months	0-50 days p.p.	yT / nL
2.04.99.	Other puerperal disorders		DD		f	PART	from 18 months	0-50 days p.p.	yT / nL
2.05.	Female infertility		DD		f	REPRO	from 12 months		y	21 days
2.05.00.	Control of oestrus cycle with no abnormality detected		E		f	REPRO	from 12 months		y
2.05.01.	Uterine infertility	infertility related to changes in the uterus	DD		f	REPRO	from 12 months		y	21 days
2.05.01.01.	Endometritis	inflammation of the mucus membranes of the uterus	DD		f	REPRO	from 12 months		y	21 days
2.05.01.01.01.	E1 Endometritis catarrhalis (catarrhal endometritis)	catarrhal inflammation of the mucus membranes of the uterus	DD		f	REPRO	from 12 months		y	21 days
2.05.01.01.02.	E2 Endometritis mucopurulenta (mucopurulent endometritis)	mucopurulent inflammation of the mucus membranes of the uterus	DD		f	REPRO	from 12 months		y	21 days
2.05.01.01.03.	E3 Endometritis purulenta (purulent endometritis)	purulent inflammation of the mucus membranes of the uterus	DD		f	REPRO	from 12 months		y	21 days
2.05.01.01.04.	E4 Pyometra	pus-filled lumen of the uterus	DD		f	REPRO	from 12 months		y	21 days
2.05.02.	Ovarial infertility	infertility related to changes in the ovaries	DD		f	REPRO	from 12 months		y	21 days
2.05.02.01.	Disturbance of the ovarial reproductive cycle		DD		f	REPRO	from 12 months		y	21 days
2.05.02.01.01.	Acyclia	absence of heat with inactive ovaries	DD		f	REPRO	from 12 months		y	21 days
2.05.02.01.02.	Anaphrodisia / Anoestria	silent heat; absence of heat with active ovaries	DD		f	REPRO	from 12 months		y	21 days
2.05.02.01.03.	Irregular interoestrus intervals		DD		f	REPRO	from 12 months		y	21 days
2.05.02.01.03.01.	Shortened interoestrus intervals	interoestrus intervals < 19 days	DD		f	REPRO	from 12 months		y	21 days
2.05.02.01.03.02.	Prolonged interoestrus intervals	interoestrus intervals > 23 days	DD		f	REPRO	from 12 months		y	21 days
2.05.02.01.03.03.	Irregular interestrus intervals		DD		f	REPRO	from 12 months		y	21 days
2.05.02.01.04.	Abnormal ovulations		DD		f	REPRO	from 12 months		y	21 days
2.05.02.01.04.01.	Delay of ovulation		DD		f	REPRO	from 12 months		y	21 days
2.05.02.01.04.02.	Anovulatory oestrus cycle		DD		f	REPRO	from 12 months		y	21 days
2.05.02.01.05.	Other disturbances of the oestrus cycle		DD		f	REPRO	from 12 months		y	21 days
2.05.02.02.	Nymphomania		DD		f	REPRO	from 12 months		y	21 days
2.05.02.03.	Virilism	masculinization of cows	DD		f	REPRO	from 12 months		y	21 days
2.05.02.04.	Ovarial cysts	cystic ovary disease	DD		f	REPRO	from 12 months		y	21 days
2.05.02.04.01.	Follicular cystic ovary disease		DD		f	REPRO	from 12 months		y	21 days
2.05.02.04.02.	Luteal cystic ovary disease		DD		f	REPRO	from 12 months		y	21 days
2.05.02.04.03.	Cystic ovarian degeneration		DD		f	REPRO	from 12 months		y	21 days
2.05.02.05.	Corpus luteum persistens (persisting corpus luteum)	delayed regression of corpus luteum	DD		f	REPRO	from 12 months		y	21 days
2.05.02.06.	Atrophy of the ovaries		DD		f	REPRO	from 12 months		y	21 days
2.05.02.07.	Dystrophy of the ovaries		DD		f	REPRO	from 12 months		y	21 days
2.05.03.	Examination due to infertility		E	2.05.	f	REPRO	from 12 months		y	21 days
2.05.04.	Treatment due to infertility		T	2.05.	f	REPRO	from 12 months		y	21 days
2.99.	Other disturbances of female fertility		DD		f				y	21 days
3.	Reproduction disorders in males				m				y	21 days
3.00.	Examination of the male reproductive system with no abnormality detected		E		m				y
3.01.	Inherited diseases of the male reproductive system		DD		m				n
3.01.01.	Cryptorchidism	incomplete descent of testicles into the scrotum	DD		m	young bull	0-12 months		n
3.01.02.	Testicular hypoplasia (hypoplasia of testes)		DD		m	young bull	8-12 months		n
3.01.03.	Anomalies of spermatozoa		DD		m	young bull	8-12 months		n
3.01.04.	Wolffian duct aplasia	failure of development of male reproductive ducts	DD		m	young bull	8-12 months		n
3.02.	Malformations of the male reproductive system		DD		m	young bull	0-12 months		n
3.02.01.	Frenulum praeputii persistens (persistent preputial frenulum)	permanent tissue connection between glans penis and preputium	DD		m	young bull	8-12 months		n
3.03.	Tumors of the male reproductive system		DD		m				y	21 days
3.03.01.	Sertoli cell tumor		DD		m				y	21 days
3.03.02.	Leydig cell tumor		DD		m				y	21 days
3.04.	Injuries of the male reproductive system		DD		m				y	21 days
3.05.	Diseases of the preputium		DD		m				y	21 days
3.05.01.	Phimosis	preputial constriction	DD		m				y	21 days
3.05.02.	Preputial inflammation		DD		m				y	21 days
3.05.03.	Paraphimosis		DD		m				y	21 days
3.05.04.	Preputial prolaps		DD		m				y	21 days
3.06.	Diseases of the penis		DD		m				y	21 days
3.06.01.	Penis hypoplasia	underdevelopment of the penis	DD		m	young bull	8-18 months		n
3.06.02.	Penis inflammation		DD		m				y	21 days
3.06.02.01.	Balanopostitis		DD		m				y	21 days
3.06.02.02.	Bleeding during erection		DD		m				y	21 days
3.06.03.	Penis prolaps		DD		m				y	21 days
3.06.04.	Penis paralysis		DD		m				y	21 days
3.06.05.	Penis hematoma		DD		m				y	21 days
3.06.06.	Penis bending		DD		m				y	21 days
3.06.07.	Penis fracture		DD		m				y	21 days
3.07.	Testicular diseases		DD		m				y	21 days
3.07.01.	Orchitis	inflammation of the testes	DD		m				y	21 days
3.07.02.	Degeneration of the testes		DD		m				n
3.07.03.	Fibrosis of the testes		DD		m				n
3.07.04.	Underdevelopment of the testes		DD		m				n
3.07.04.01.	Hypoplasia of the testes		DD		m				n
3.07.04.02.	Aplasia of the testes		DD		m				n
3.07.05.	Castration
3.08.	Epididymal diseases		DD		m				y	21 days
3.08.01.	Epididymitis	inflammation of the epididymes	DD		m				y	21 days
3.09.	Scrotal diseases		DD		m				y	21 days
3.09.01.	Inflammation of the scrotum		DD		m				y	21 days
3.10.	Impotentia (male infertility)		DD		m	REPRO	from 12 months		y	21 days
3.10.00.	Virility control with no abnormality detected		DD		m	REPRO	from 12 months		y
3.10.01.	Impotentia generandi	lack of fertile semen	DD		m	REPRO	from 12 months		y	21 days
3.10.02.	Impotentia coeundi	erection disturbance	DD		m	REPRO	from 12 months		y	21 days
3.99.	Other male reproductive disorders		DD		m				y	21 days
4.	Infectious disease and other microbe-related diseases (except local infections of udder and claws)								y	21 days
4.01.	Prion diseases		CD						n
4.01.01.	BSE = Bovine Spongiform Encephalopathy		CD						n
4.01.02.	Other prion diseases		CD						n
4.02.	Viral infections (except local infections of udder and claws)		CD						y	21 days
4.02.01.	Rotavirus infection		CD						y	21 days
4.02.02.	Coronavirus infection		CD						y	21 days
4.02.03.	Parvovirus infection		CD						y	21 days
4.02.04.	PI = Parainfluenza (infection with Parainfluenza 3 virus)		CD						y	21 days
4.02.05.	BVD / MD = Bovine Virusdiarrhea / Mucosal Disease		CD						y	21 days
4.02.05.01.	BVD = Bovine Virusdiarrhea		CD						y	21 days
4.02.05.02.	MD = Mucosal disease		CD						y	21 days
4.02.06.	BMCF = Bovine malignant catarrhal fever		CD						y	21 days
4.02.07.	Adenovirus infection		CD						y	21 days
4.02.08.	Infection with BRSV = Bovine respiratory syncytialvirus		CD						y	21 days
4.02.09.	Infection with BHV1 = Bovine herpes virus 1		CD						n
4.02.09.01.	IBR = Infectious bovine rhinotracheitis		CD						n
4.02.09.02.	IPV = Infectious pustular vulvovaginitis		CD		f				n
4.02.09.03	IBP = Infectious balanoposthitis	infectious penoposthitis	CD		m				n
4.02.10.	Papillomatosis	cutaneous and mucosal warts due to papilloma virus infection	CD						y	21 days
4.02.11.	Cowpox	cowpox and vaccinia; diseases caused by orthopox virus infections	CD						y	21 days
4.02.12.	FMS = Foot-and-mouth disease		CD						y	21 days
4.02.13.	Stomatitis vesicularis (vesicular stomatitis)		CD						y	21 days
4.02.14.	Stomatitis papulosa		CD						y	21 days
4.02.15.	Aujeszky's disease (Pseudorabies)		CD						y	21 days
4.02.16.	EBL = Enzootic bovine leukosis / leukemia	bovine lymphadenosis, lymphosarcomatosis; diseases after infection with BLV = bovine leucosis / leukemia virus	CD						y	21 days
4.02.17.	Rabies		CD						y	21 days
4.02.18.	BT = Bluetongue		CD						y	21 days
4.02.19.	Rinderpest		CD						y	21 days
4.02.20.	Schmallenberg virus infection		CD						y	21 days
4.02.99.	Other virus infections		CD						y	21 days
4.03.	Bacterial infections (except local bacterial infections of udder and claws)		CD						y	21 days
4.03.01.	Escherichia coli infection		CD						y	21 days
4.03.01.01.	Coli septicemia	general disease due to infection with Escherichia coli	CD						y	21 days
4.03.01.02.	Coli diarrhoea	diarrhoea due to infection with Escherichia coli	CD						y	21 days
4.03.02.	Yersinia enterocolitica infection		CD						y	21 days
4.03.03.	Salmonellosis	disease caused by infection with Salmonella spp.	CD						y	21 days
4.03.03.01.	Salmonella dublin infection		CD						y	21 days
4.03.03.02.	Salmonella typhimurium infection		CD						y	21 days
4.03.03.03.	Salmonella enteridis infection		CD						y	21 days
4.03.03.04.	Other Salmonella infections		CD						y	21 days
4.03.04.	Paratuberkulosis (Johne disease)	intestinal disease after infection with Mycobacterium paratuberculosis	CD						y	21 days
4.03.05.	Pasteurellosis	shipping fever, transit fever; infection with Pasteurella spp.	CD						y	21 days
4.03.05.01.	Acute pasteurellosis	haemorrhagic septicaemia; severe general disease caused by infection with Pasteurella multocida	CD						y	21 days
4.03.05.02.	Chronic pasteurellosis	chronic inflammatory changes of pleura and lungs due to infection with Pasteurella spp.	CD						y	21 days
4.03.06.	Infection with streptococcus pneumoniae		CD						y	21 days
4.03.07.	Mycoplasma infection		CD						y	21 days
4.03.08.	Infection with arcanobacterium pyogenes		CD						y	21 days
4.03.08.01.	Pyobacillosis	abscess formation after infection with Arcanobacterium pyogenes	CD						y	21 days
4.03.08.02.	Uterine infection with Arcanobacterium pyogenes		CD		f				y	21 days
4.03.09.	Infection with Staphylococci		CD						y	21 days
4.03.09.01.	Acne due to infection with Staphylococci	purulent inflammation of hair follicles and sebaceous glands due to Staphylococcus infection	CD						y	21 days
4.03.09.02.	Furunculosis due to infection with staphylococcus spp.	disseminated deep purulent inflammation of hair follicles and sebaceous glands due to Staphylococcus infection	CD						y	21 days
4.03.10.	Actinobacillosis	wooden tongue; granulomatous inflammation due to infection with Actinobacillus lignieresi, mainly affecting soft tissue like tongue	CD						y	21 days
4.03.11.	Actinomycosis	lumpy jaw; granulomatous inflammation due to infection with Actinomyces bovis, mainly affecting mandible and maxilla bones	CD						y	21 days
4.03.12.	Infection with fusobacterium necropherum / bacteroides nodosus		CD						y	21 days
4.03.12.01.	Necrobacillosis	purulent and necrotizing inflammation of organs due to infection with Fusobacterium necrophorum	CD						y	21 days
4.03.12.02.	Calf diphtheria	purulent and necrotizing inflammation of oral and/or laryngeal mucus membranes due to infection with Fusobacterium necrophorum in calves	CD						y	21 days
4.03.13.	Diseases caused by Clostridia	Clostridium infections and intoxications	CD						y	21 days
4.03.13.01.	Blackleg	blackquarter; fluid and gas accumulation in muscles after infection with Clostridium chauvoei	CD						y	21 days
4.03.13.02.	Braxy	fluid and gas accumulation in muscles and connective tissue after infection with Clostridium septicum	CD						y	21 days
4.03.13.03.	Malignant edema	fluid and gas accumulation in muscles and connective tissue after infection with Clostridium novyi and Clostridium perfringens	CD						y	21 days
4.03.13.04.	Gas edema disease	fluid and gas accumulation in tissue after mixed infections with gas-producing bacteria	CD						y	21 days
4.03.13.05.	Infectious necrotic hepatitis (black disease)	liver necroses and severe general signs of disease after infection with Clostridium novyi	CD						y	21 days
4.03.13.06.	Clostridium perfringens enterotoxaemia	intestinal inflammations caused by toxins of Clostridium perfringens	CD						y	21 days
4.03.13.07.	Tetanus	convulsive disease after wound infection with Clostridium tetani	CD						y	21 days
4.03.13.08.	Botulism	paralytic disease caused by toxins of Clostridium botulinum	CD						y	21 days
4.03.14.	Moraxella bovis infection		CD						y	21 days
4.03.14.01.	IBK = Infectious bovine keratoconjunctivitis	pink eye; contagious inflammation of cornea and conjunctiva of the eye after infection with Moraxella bovis and/or other microbes	CD						y	21 days
4.03.15.	Corynebacterium renale infection		CD						y	21 days
4.03.16.	TEME = Thromboembolic meningoencephalitis	thromboembolic disease with neurological signs after infection with Haemophilus somnus	CD						y	21 days
4.03.17.	Campylobacter infection		CD						y	21 days
4.03.17.01.	Enzootic Campylobacter abortion	venereal campylobacteriosis, bovine genital campylobacteriosis, vibriosis genitalis; abortion after mucosal infection of female reproductive tract with Campylobacter fetus ssp. venerealis	CD						y	21 days
4.03.17.02.	Campylobacter enteritis (winter dysentery)	winter scours, vibrionic enteritis; dysentery after infection with Campylobacter spp.	CD						y	21 days
4.03.18.	Chlamydia infection		CD						y	21 days
4.03.18.01.	Epizootic bovine abortion	abortion after infection with Chlamydophila psittaci	CD						y	21 days
4.03.18.02.	Chlamydia bronchopneumonia	inflammation of bronchial tubes and lungs after infection with Chlamydia	CD						y	21 days
4.03.18.03.	Chlamydia polyarthritis	inflammation of multiple joints after infection with Chlamydia	CD						y	21 days
4.03.18.04.	Sporadic encephalomyelitis		CD						y	21 days
4.03.19.	Infection with Erysipelothrix rusiopathiae		CD						y	21 days
4.03.20.	Nocardiosis	purulent inflammations with granuloma formation after infection with Nocardia spp.	CD						y	21 days
4.03.21.	Listeriosis	diseases after infection with Listeria monocytogenes	CD						y	21 days
4.03.22.	Leptospirosis	diseases after infection with Leptospira spp.	CD						y	21 days
4.03.23.	Coxiellosis (Query fever)	Queensland fever, Q-fever; diseases after infections with Coxiella burnetii	CD						y	21 days
4.03.24.	Anthrax	severe hemorrhagic disease after infection with Bacillus anthracis	CD						y	21 days
4.03.25.	Tuberculosis	diseases after infections with Mycobacterium bovis and Mycobacterium tuberculosis	CD						y	21 days
4.03.26.	Brucellosis	diseases and abortion after infection with Brucella abortus	CD						y	21 days
4.03.27.	Pleuropneumonia contagiosa (contagious bovine pleuropneumonia)	severe inflammation of pleura and lungs after infection with Mycoplasma mycoides ssp. mycoides	CD						y	21 days
4.03.99.	Other bacterial infections		CD						y	21 days
4.04.	Mycoses (fungal infections except local infections of udder and claws)		CD						y	21 days
4.04.01.	Trichophytia (dermatophytosis)	ringworm; mycotic skin disease after infection with Trichophyton verrucosum	CD						y	21 days
4.04.02.	Aspergillosis	diseases after infection with Aspergillus spp.	CD						y	21 days
4.04.03.	Candidosis, Candidiasis	diseases after infection with Candida albicans	CD						y	21 days
4.04.99.	Other mycoses		CD						y	21 days
4.05.	Mycotoxicoses	diseases caused by mycotoxins	CD						y	21 days
4.05.01.	Ergotism (ergot poisoning)	diseases caused by ingestion of mycotoxins of Claviceps purpurea	CD						y	21 days
4.05.02.	Aflatoxicosis (aflatoxin poisoning)	diseases caused by mycotoxin Aflatoxin prodcued by Aspergillus spp. and Penicillium spp.	CD						y	21 days
4.05.03.	Aspergillotoxicosis (aspergillus poisoning)	diseases caused by mycotoxins of Aspergillus	CD						y	21 days
4.05.04.	Stachybotryotoxicosis	diseases caused by mycotoxins of Stachybotrys alternans	CD						y	21 days
4.05.05.	Fusariotoxicosis	diseases caused by mycotoxins of Fusarium spp.	CD						y	21 days
4.05.06.	Rust poisoning	diseases caused by rust mycotoxins, mainly of Puccinia spp.	CD						y	21 days
4.05.07.	Smut poisoning	diseases caused by smut mycotoxins of Tilletia spp. and Ustilago spp.	CD						y	21 days
4.05.99.	Other mycotoxicoses		CD						y	21 days
4.99.	Other infectious diseases and microbe-related diseases (except local infections of udder and claws)		CD						y	21 days
5.	Parasitoses (parasite infestations)								y	21 days
5.01.	Protozoal infections (infestation with parasitical protozoae)		CD						y	21 days
5.01.01.	Trichomoniasis bovis (trichomonadosis bovis)	infection with tritrichomonas foetus	CD						y	21 days
5.01.02.	Coccidiosis	dysenteria coccidiosa, coccidial gastroenteritis; infection with Eimeria species from order Coccidia	CD						y	21 days
5.01.03.	Cryptosporidiosis	infection with Cryptosporidium spp.	CD						y	21 days
5.01.04.	Toxoplasmosis	infection with Toxoplasma gondii	CD						y	21 days
5.01.05.	Sarcosporidiosis (sarcocystosis)	muscle cysts of Sarcocystsis species	CD						y	21 days
5.01.06.	Piroplasmosis, i.e. babesiosis (redwater) and theileriosis	diseases caused by Piroplasma infection, i.e. infections with Babesia spp. and Theileria spp.	CD						y	21 days
5.01.99.	Other protozoal infections		CD						y	21 days
5.02.	Helminth infestations		CD						y	21 days
5.02.01.	Trematode infestations		CD						y	21 days
5.02.01.01.	Fasciolosis (fascioliasis)	infections with Fasciola hepatica (and other trematodes of genus Fasciola)	CD						y	21 days
5.02.01.02.	Dicrocoeliosis	infections with Dicrocoelium dendriticum	CD						y	21 days
5.02.02.	Paramphistomatosis	stomach fluke disease, intestinal amphistomiosis; infections with Paramphistomum species	CD						y	21 days
5.02.03.	Anoplocephalidosis and Monieziosis	infections with tapeworms species Anaplocephala and Moniezia	CD						y	21 days
5.02.04.	Cysticercosis, i.e. echinococcosis and coenurosis	diseases caused by cysticerus of tapeworms species Echinococcus und Taenia	CD						y	21 days
5.02.05.	Dictyocaulosis / Bronchopneumonia verminosa (parasitic bronchitis)	husk, hoose; inflammation of bronchi and lungs due to infection with Dictyocaulus viviparus	CD						y	21 days
5.02.06.	Strongyloidosis	infection with Strongyloides species	CD						y	21 days
5.02.07.	Trichostrongylidosis	gastroenteral Strongylidosis; infections with gastroenteral nematodes	CD						y	21 days
5.02.07.01.	Nematodirosis	infection with Nematodirus species	CD						y	21 days
5.02.07.02.	Haemonchosis	infection with Haemonchus species	CD						y	21 days
5.02.07.03.	Ostertagiosis	infection with Ostertagia species	CD						y	21 days
5.02.07.04.	Trichostrongylosis	infection with Trichostrongylus species	CD						y	21 days
5.02.07.05.	Cooperiosis	infection with Cooperia species	CD						y	21 days
5.02.08.	Oesophagostomosis	infection with Oesophagostomum species	CD						y	21 days
5.02.09.	Bunostomosis (hookworm infection)	infection with Bunostomum species	CD						y	21 days
5.02.99.	Other helminth infestations		CD						y	21 days
5.03.	Arthropode infestations		CD						y	21 days
5.03.01.	Tick infestations	infestation with ixodic ticks (Ixodidae) and argasid ticks (Argasidae)	CD						y	21 days
5.03.02.	Demodicosis	demodectic mite infestation; infestation with Demodex bovis	CD						y	21 days
5.03.03.	Trombidiosis (trombidiasis)	infestation with Neotrombicula autumnalis	CD						y	21 days
5.03.04.	Scabies	mange; infections with scabies mites	CD						y	21 days
5.03.04.01.	Sarcoptic scabies	sarcoptic mange, head scabies; infection with burrowing mites	CD						y	21 days
5.03.04.02.	Psoroptic scabies	psoroptic mange, body scabies; infection with sucking mites	CD						y	21 days
5.03.04.03.	Chorioptic scabies	chorioptic mange, tail and feet scabies; infection with surface mites	CD						y	21 days
5.03.05.	Pediculosis	sucking lice infestation; infestation with Haematopinus eurysternus = short-nosed sucking lice and Linognathus vituli = long-nosed sucking lice	CD						y	21 days
5.03.06.	Trichodektosis	infestations with Bovicola bovis	CD						y	21 days
5.03.07.	Simuliosis	infestations with Simulium spp.	CD						y	21 days
5.03.08.	Infestation with tabanidae and muscidae		CD						y	21 days
5.03.09.	Myiasis	diseases caused by larvae of flies	CD						y	21 days
5.03.10.	Hypodermatosis	warble disease; diseases caused by infections with larvae of Hypoderminae flies	CD						y	21 days
5.03.99.	Other arthropod infestations		CD						y	21 days
5.99.	Other parasitoses		CD						y	21 days
6.	Metabolic diseases and deficiencies								y	14 days
6.00.	Examination for metabolic diseases and deficiencies with no abnormality detected		E						y
6.01.	Disturbances of energy, carbohydrate and fat metabolism		CD						y	14 days
6.01.01.	Hyperketonemia / acetonemia	increased content of keton bodies in the blood	CD						y	14 days
6.01.02.	Ketosis	slow fever; disturbance of carbohydrate metabolism with increased content of ketone bodies in the blood	CD						y	14 days
6.01.02.01.	Primary ketosis	primary disturbance of carbohydrate metabolism with increased content of ketone bodies and reduced content of glucose in the blood	CD						y	14 days
6.01.02.01.01	Subclinical primary ketosis	primary disturbance of carbohydrate metabolism with increased content of ketone bodies and reduced content of glucose in the blood without accompanying signs of disease	CD						y	14 days
6.01.02.01.02.	Manifest primary ketosis	primary disturbance of carbohydrate metabolism with increased content of ketone bodies and reduced content of glucose in the blood with accompanying signs of disease	CD						y	14 days
6.01.02.02.	Secondary ketosis	secondary, i.e. in connection with other disease occurring, disturbance of carbohydrate metabolism with increased content of ketone bodies and reduced content of glucose in the blood	CD						y	14 days
6.01.02.02.01.	Subclinical secondary ketosis	secondary, i.e. in connection with other disease occurring, disturbance of carbohydrate metabolism with increased content of ketone bodies and reduced content of glucose in the blood without accompanying signs of disease	CD						y	14 days
6.01.02.02.02.	Manifest secondary ketosis	secondary, i.e. in connection with other disease occurring, disturbance of carbohydrate metabolism with increased content of ketone bodies and reduced content of glucose in the blood with accompanying signs of disease	CD						y	14 days
6.01.03.	Lipidosis hepatis / Steatosis hepatis (fatty liver syndrome)	fatty infiltration and degeneration of the liver	CD						y	14 days
6.01.03.01.	Hepatic coma	severe disturbance of energy metabolism with hepatic failure	CD						y	14 days
6.01.04.	Adipositas		CD						y	14 days
6.01.04.01.	Fat cow syndrome	lipomobilization syndrome; disturbance of energy metabolism with excessive fat utilization in energetically undernourished, fat cows	CD						y	14 days
6.01.05.	Excessive loss of weight		CD						y	14 days
6.01.05.01.	Thin pregnant cow syndrome	excessive loss of weight in late gestation	CD		f	PART	from 18 months	0-150 days a.p.	y	14 days
6.01.06.	Paralytic myoglobinuria	disturbance of carbohydrate metabolism with signs of paralysis and urinary excretion of myoglobin	CD						y	14 days
6.01.99.	Other disturbances of energy, carbohydrate and fat metabolism		CD						y	14 days
6.02.	Disturbances of protein metabolism		CD						y	14 days
6.02.99.	Other disturbances of protein metabolism		CD						y	14 days
6.03.	Disturbances of mineral balance		CD						y	14 days
6.03.01.	Disturbances of calcium and phosphorus balance		CD						y	14 days
6.03.01.01.	Parturient paresis (milk fever)	permanent recumbency of the dairy cow with reduced calcium and phosphorus content of the blood	CD		f	PART	from 18 months	0-100 days p.p.	y	14 days
6.03.01.01.01.	Typical parturient paresis / Stages 1 and 2 of parturient paresis	hypocalcemic parturient paresis; recumbency after calving with reduced calcium and phosphorus content of the blood and without or with reduced responsiveness	CD		f	PART	from 18 months	0-100 days p.p.	y	14 days
6.03.01.01.02.	Parturient coma / Stage 3 of parturient paresis	recumbency after calving with reduced calcium and phosphorus content of the blood and severely reduced responsiveness	CD		f	PART	from 18 months	0-100 days p.p.	y	14 days
6.03.01.01.03.	Atypical parturient paresis	recumbency after calving of unknown cause without reduced responsiveness	CD		f	PART	from 18 months	0-100 days p.p.	y	14 days
6.03.01.01.04.	Downer cow syndrome	recumbency after calving without response to therapeutic calcium infusion	CD		f	PART	from 18 months	0-100 days p.p.	y	14 days
6.03.01.01.05.	Lactation paresis	recumbency of the lactating cow unrelated to calving with reduced calcium content of the blood	CD		f	PART	from 18 months	0-100 days p.p.	y	14 days
6.03.01.02.	Osteopathies (bone diseases) due to disturbances of calcium and phosphorus balance		CD						y	14 days
6.03.01.02.01.	Rickets of calves		CD			calf	0-12 months		y	14 days
6.03.01.02.02.	Osteomalacia of the dairy cow		CD		f	LACT	from 18 months		y	14 days
6.03.01.02.03.	Osteoporosis of the fattening bull		CD		m				y	14 days
6.03.01.02.04.	Epiphysiolysis distalis ossium metacarpalium seu metatarsalium (metacarpal or metatarsal epiphysiolysis)	loosing of the distal ends of bones in the metacarpus or metatarsus	CD						y	14 days
6.03.01.02.05.	Rupture of the gastrocnemius muscle or tendon (Achilles tendon rupture) due to disturbances of calcium and phosphorus balance		CD						y	14 days
6.03.01.02.06.	Osteochondrosis et Osteoarthrosis	degenerative changes in joint cartilage due to disturbances of calcium and phosphorus balance	CD						y	14 days
6.03.02.	Disturbances of magnesium balance		CD						y	14 days
6.03.02.01.	Hypomagnesemic tetany	signs of paralysis with reduced magnesium content of the blood	CD						y	14 days
6.03.02.01.01.	Hypomagnesemic tetany of calves	hypomagnesaemia with hyperexcitability, muscle spasm and convulsion in suckling calves	CD			calf	0-12 months		y	14 days
6.03.02.01.02.	Grass tetany	grass staggers; hyperexcitability, muscle spasm and convulsion with reduced magnesium content of the blood after grazing on lush pastures	CD						y	14 days
6.03.02.01.03.	Stable tetany	hyperexcitability, muscle spasm and convulsion with reduced magnesium content of the blood in stabled animals with insufficient nutrional magnesium supply	CD						y	14 days
6.03.02.01.04.	Transport tetany	muscle spasm and convulsion with reduced magnesium content of the blood after exhausting transport	CD						y	14 days
6.03.03.	Disturbances of sodium balance		CD						y	14 days
6.03.03.01.	Sodium deficiency		CD						y	14 days
6.03.04.	Disturbances of chloride balance		CD						y	14 days
6.03.04.01.	Chloride deficiency		CD						y	14 days
6.03.05.	Disturbances of sulfur balance		CD						y	14 days
6.03.05.01.	Sulfur deficiency		CD						y	14 days
6.03.06.	Disturbances of potassium balance		CD						y	14 days
6.03.99.	Other disturbances of mineral balance		CD						y	14 days
6.04.	Disturbances of trace element balance		CD						y	14 days
6.04.01.	Iron deficiency		CD						y	14 days
6.04.01.01.	Iron deficiency anemia in calves	anemia in suckling calves due to lack of iron	CD			calf	0-12 months		y	14 days
6.04.02.	Copper deficiency		CD						y	14 days
6.04.02.01.	Copper deficiency anemia	anemia due to lack of copper	CD						y	14 days
6.04.03.	Zinc deficiency		CD						y	14 days
6.04.03.01.	Parakeratosis due to zinc deficiency	disturbance of keratinization due to lack of zinc	CD						y	14 days
6.04.04.	Selenium deficiency		CD						y	14 days
6.04.05.	Manganese deficiency		CD						y	14 days
6.04.06.	Iodine deficiency		CD						y	14 days
6.04.07.	Cobalt deficiency		CD						y	14 days
6.04.99.	Other disturbances of trace element balance		CD						y	14 days
6.05.	Disturbances of vitamin balance		CD						y	14 days
6.05.01.	Beta carotine deficiency	provitamin A deficiency	CD						y	14 days
6.05.02.	Vitamin A deficiency (hypovitaminosis A)		CD						y	14 days
6.05.03.	Vitamin E deficiency		CD						y	14 days
6.05.04.	Vitamin D deficiency		CD						y	14 days
6.05.05.	Vitamin B1 deficiency		CD						y	14 days
6.05.05.01.	CCN = Cerebrocorticalnecrosis (necrosis of the cerebral cortex)	polioencephalomalacia; softening and necrosis of the cerebral cortex due to lack of vitamin B1 = thiamine	CD			suckling calf	0-12 weeks		y	14 days
6.05.06.	Vitamin B12 deficiency		CD						y	14 days
6.05.07.	Biotin deficiency		CD						y	14 days
6.05.08.	Folic acid deficiency		CD						y	14 days
6.05.99.	Other disturbances of vitamin balance		CD						y	14 days
6.99.	Other metabolic diseases and deficiencies		CD						y	14 days
7.	Poisoning								y	21 days
7.01.	Poisoning with feed contents and additives		CD						y	21 days
7.01.01.	Sodium chloride poisoning		CD						y	21 days
7.01.02.	Nitrate / nitrite poisoning		CD						y	21 days
7.01.03.	Urea poisoning		CD						y	21 days
7.02.	Poisoning with metals, semi-metals and their salts		CD						y	21 days
7.02.01.	Saturnism	lead poisoning	CD						y	21 days
7.02.02.	Cuprism	copper poisoning	CD						y	21 days
7.02.03.	Selenosis	selenium poisoning	CD						y	21 days
7.02.04.	Molybdenosis	molybdenum poisoning	CD						y	21 days
7.02.05.	Mercurialism	mercury poisoning	CD						y	21 days
7.02.06.	Iron poisoning		CD						y	21 days
7.02.07.	Arsenic poisoning		CD						y	21 days
7.02.08.	Fluorine poisoning		CD						y	21 days
7.02.09.	Cadmium poisoning		CD						y	21 days
7.03.	Drug poisonings		CD						y	21 days
7.03.01.	Hypervitaminosis D	excess of vitamin D	CD						y	21 days
7.03.01.01.	Calcinosis	excess of calcium	CD						y	21 days
7.03.02.	Hypervitaminosis A	excess of vitamin A	CD						y	21 days
7.03.03.	Poisoning with esters of phosphoric acid		CD						y	21 days
7.03.04.	Poisoning with chlorinated carbon hydrides		CD						y	21 days
7.03.05.	Furazolidone poisoning		CD						y	21 days
7.04.	Poisoning with disinfectants		CD						y	21 days
7.04.01.	Base poisoning		CD						y	21 days
7.04.02.	Acid poisoning		CD						y	21 days
7.04.03.	Phenol poisoning		CD						y	21 days
7.04.04.	Aldehyde poisoning		CD						y	21 days
7.04.05.	Halogenide poisoning		CD						y	21 days
7.05.	Poisoning with fertilizers		CD						y	21 days
7.06.	Poisoning with herbicides and pesticides		CD						y	21 days
7.07.	Poisoning with phytotoxins and toxic plants		CD						y	21 days
7.07.01.	Onion poisoning		CD						y	21 days
7.07.02.	Yew poisoning		CD						y	21 days
7.08.	Poisoning with animal toxins		CD						y	21 days
7.09.	Poisoning with industrial pollutants		CD						y	21 days
7.99.	Other poisonings		CD						y	21 days
8.	Behavioral disorders and general findings								y	21 days
8.01.	Illusive sucking		DD						y	21 days
8.02.	Sucking of milk		DD						y	21 days
8.03.	Tongue stereotypies		DD						y	21 days
8.04.	Urine drinking		DD						y	21 days
8.05.	Licking stereotypies		DD						y	21 days
8.06.	Kicking		DD						y	21 days
8.07.	Not fixable in claw treatment crush because of behavioral reasons		DD						y	21 days
8.08.	Performance depression		DD						y	21 days
8.09.	Poor body development		DD						y	21 days
8.10.	Disturbed digestion		DD						y	21 days
8.11.	Fever		DD						y	21 days
8.12.	Recumbency		DD						y	21 days
8.13.	Diarrhea		DD						y	21 days
8.99.	Other behavioral disorders and general findings		DD						y	21 days
9.	Health-related information not representing diagnoses								y	21 days
9.01.	No diagnosis possible								y	21 days
9.02.	Diagnosis not listed in the key								y	21 days
9.02.01.				EX					y
